# Supplementary material for: Synthesis, biological evaluation, and molecular modelling of new naphthalene-chalcone derivatives as potential anticancer agents on MCF-7 breast cancer cells by targeting tubulin colchicine binding site
Source: J Enzyme Inhib Med Chem. 2019 Nov 14;35(1):139–44. doi: 10.1080/14756366.2019.1690479 (PMC6882462; doi:10.1080/14756366.2019.1690479)
Supplement: Supplemental Material [file IENZ_A_1690479_SM1773.pdf]

## **Synthesis, biological evaluation, and molecular modeling of of new naphthalene-chalcone derivatives as potential anticancer agents on MCF-7 breast cancer cells by targeting tubulin colchicine binding site**

### **1. Experimental section.**

#### **1.1. Chemistry.**

All starting materials and reagents were purchased from commercial suppliers. TLC was performed on 0.20 mm Silica Gel 60 F<sub>254</sub> plates (Qingdao Ocean Chemical Factory, Shandong, China). Nuclear magnetic resonance spectra (NMR) were recorded on a Bruker spectrometer (400 MHz) with TMS as an external reference and reported in parts per million. High resolution mass spectra (HRMS) were recorded on Bruker MicroQTOFII using ESI method.

#### **1-(2-methoxynaphthalen-1-yl)ethan-1-one (2)**

To a solution of 1-(2-hydroxynaphthalen-1-yl)ethan-1-one (**1**, 10 mmol) in acetone (50 mL) was added Cs<sub>2</sub>CO<sub>3</sub> (20 mmol) and methyl iodide (12 mmol) and stirred at room temperature for 12 hours. Then, the reaction mixture was filtered and the solvent was evaporated. The residue was purified by chromatography on silica gel using EtOAc/petroleum ether as eluent to afford 1-(2-methoxynaphthalen-1-yl)ethan-1-one (**2**).

General procedures for the synthesis of **3a-3t**

A mixture of compound **2** (1.0 mmol) and commercially available aryl aldehyde (1.0 mmol) in MeOH (10 mL) was stirred at ice bath for 0.5 h. Then a solution of KOH aqueous (50%, 3 mL) was added dropwise to the reaction and this was stirred at room temperature for a further 24 hours. After completion of reaction, the reaction mixture was poured on crushed ice and neutralized with concentrated HCl. The precipitated solid was filtered and recrystallized from ethanol to provide the target compounds **3a-3t**. The most of compounds have not been reported in literature except compounds **3b**, **3h**, **3k**, **3n**, **3q** and **3r**.

*(E)*-3-(3-Hydroxy-4-methoxyphenyl)-1-(2-methoxynaphthalen-1-yl)prop-2-en-1-one  
**(3a)**

Yellow solid, yield = 59 %, mp 135-136 °C; <sup>1</sup>H NMR (CDCl<sub>3</sub>, 400 MHz) δ: 7.91 (d, 1H, *J* = 8.8 Hz, ArH), 7.80 (d, 1H, *J* = 8.0 Hz, ArH), 7.66 (d, 1H, *J* = 8.4 Hz, ArH), 7.40-7.44 (m, 1H, ArH), 7.35-7.37 (m, 1H, ArH), 7.31 (d, 1H, *J* = 8.8 Hz, ArH), 7.21 (d, 1H, *J* = 16.0 Hz, COCH=CH), 7.16 (d, 1H, *J* = 2.0 Hz, ArH), 6.96 (d, 1H, *J* = 16.0 Hz, COCH=CH), 6.95 (dd, 1H, *J* = 8.0 Hz, 2.4 Hz, ArH), 6.78 (d, 1H, *J* = 8.4 Hz, ArH), 5.64 (s, 1H, OH), 3.91 (s, 3H, OCH<sub>3</sub>), 3.89 (s, 3H, OCH<sub>3</sub>); <sup>13</sup>C NMR (CDCl<sub>3</sub>, 100 MHz) δ: 197.53, 154.09, 148.90, 146.08, 145.91, 131.63, 131.21, 128.89, 128.31, 128.13, 127.50, 127.30, 124.27, 124.14, 123.77, 122.57, 113.44, 113.24, 110.55, 56.75, 56.10; HRMS (TOF) calcd for [M+Na]<sup>+</sup> C<sub>21</sub>H<sub>18</sub>NaO<sub>4</sub><sup>+</sup>: 357.1097 found 357.1098.

*(E)*-3-(4-Bromophenyl)-1-(2-methoxynaphthalen-1-yl)prop-2-en-1-one **(3b)**

Yellow solid, yield = 48 %, mp 127-129 °C; <sup>1</sup>H NMR (CDCl<sub>3</sub>, 400 MHz) δ: 7.94 (d, 1H, *J* = 8.8 Hz, ArH), 7.82 (d, 1H, *J* = 8.0 Hz, ArH), 7.67 (d, 1H, *J* = 8.4 Hz, ArH),

7.43-7.50 (m, 3H), 7.33-7.40 (m, 4H, ArH), 7.26 (d, 1H,  $J = 16.0$  Hz, COCH=CH), 7.09 (d, 1H,  $J = 16.0$  Hz, COCH=CH), 3.93 (s, 3H, OCH<sub>3</sub>); <sup>13</sup>C NMR (CDCl<sub>3</sub>, 100 MHz)  $\delta$ : 196.71, 153.77, 143.68, 133.11, 131.71, 131.65, 131.07, 131.00, 129.39, 128.78, 128.35, 127.73, 127.65, 127.15, 124.41, 123.71, 123.59, 123.45, 122.75, 112.59, 56.18; HRMS (TOF) calcd for [M+Na]<sup>+</sup> C<sub>20</sub>H<sub>15</sub>BrNaO<sub>2</sub><sup>+</sup>: 389.0148 found 389.0149.

*(E)*-1-(2-Methoxynaphthalen-1-yl)-3-(2,3,4-trimethoxyphenyl)prop-2-en-1-one (**3c**)

Yellow solid, yield = 63 %, mp 107-108 °C; <sup>1</sup>H NMR (CDCl<sub>3</sub>, 400 MHz)  $\delta$ : 7.89-7.92 (m, 1H), 7.78-7.81 (m, 1H), 7.67-7.70 (m, 1H), 7.51-7.56 (m, 1H), 7.24-7.43 (m, 4H), 7.06-7.11 (m, 1H), 6.65-6.68 (m, 1H), 3.91 (s, 3H), 3.86 (s, 3H), 3.80 (s, 3H), 3.69 (s, 3H); <sup>13</sup>C NMR (CDCl<sub>3</sub>, 100 MHz)  $\delta$ : 197.92, 155.93, 154.02, 153.59, 142.43, 141.41, 131.69, 131.16, 128.91, 128.13, 127.96, 127.37, 124.31, 124.06, 123.86, 123.56, 121.79, 113.22, 107.78, 61.55, 61.01, 56.73, 56.17; HRMS (TOF) calcd for [M+Na]<sup>+</sup> C<sub>23</sub>H<sub>22</sub>NaO<sub>5</sub><sup>+</sup>: 401.1359 found 401.1359.

*(E)*-3-(2-Bromophenyl)-1-(2-methoxynaphthalen-1-yl)prop-2-en-1-one (**3d**)

Yellow solid, yield = 41 %, mp 150-152 °C; <sup>1</sup>H NMR (CDCl<sub>3</sub>, 400 MHz)  $\delta$ : 7.94 (d, 1H,  $J = 8.8$  Hz, ArH), 7.82 (d, 1H,  $J = 8.0$  Hz, ArH), 7.72 (d, 1H,  $J = 16.0$  Hz, COCH=CH), 7.71 (d, 1H,  $J = 8.0$  Hz, ArH), 7.67 (dd, 1H,  $J = 8.0$  Hz, 1.2 Hz, ArH), 7.54 (d, 1H,  $J = 8.0$  Hz, ArH), 7.47 (dt, 1H,  $J = 8.0$  Hz, 1.2 Hz, ArH), 7.31-7.39 (m, 3H), 7.21 (dt, 1H,  $J = 8.0$  Hz, 1.2 Hz, ArH), 7.02 (d, 1H,  $J = 16.0$  Hz, COCH=CH), 3.96 (s, 3H, OCH<sub>3</sub>); <sup>13</sup>C NMR (CDCl<sub>3</sub>, 100 MHz)  $\delta$ : 196.73, 153.87, 143.64, 134.26, 132.97, 132.88, 131.20, 131.14, 131.03, 130.91, 130.60, 128.36, 127.71, 127.57, 127.48, 127.27, 127.11, 125.26, 123.64, 122.51, 112.43, 56.10; HRMS (TOF) calcd for [M+K]<sup>+</sup>

$\text{C}_{20}\text{H}_{15}\text{BrKO}_2^+$ : 404.9887 found 404.9889.

*(E)*-1-(2-Methoxynaphthalen-1-yl)-3-(naphthalen-1-yl)prop-2-en-1-one (**3e**)

Yellow solid, yield = 62 %, mp 162-163 °C;  $^1\text{H}$  NMR ( $\text{CDCl}_3$ , 400 MHz)  $\delta$ : 8.24 (d, 1H,  $J$  = 16.0 Hz,  $\text{COCH}=\text{CH}$ ), 7.96 (d, 1H,  $J$  = 8.8 Hz, ArH), 7.80-7.91 (m, 6H, ArH), 7.46-7.50 (m, 4H, ArH), 7.24-7.41 (m, 2H, ArH), 7.20 (d, 1H,  $J$  = 16.0 Hz,  $\text{COCH}=\text{CH}$ ), 3.96 (s, 3H,  $\text{OCH}_3$ );  $^{13}\text{C}$  NMR ( $\text{CDCl}_3$ , 100 MHz)  $\delta$ : 197.18, 154.46, 142.48, 133.75, 132.04, 131.67, 131.59, 131.29, 130.91, 128.98, 128.86, 128.27, 127.71, 126.95, 126.29, 125.59, 125.46, 124.27, 123.62, 123.27, 113.17, 56.73; HRMS (TOF) calcd for  $[\text{M}+\text{K}]^+ \text{C}_{24}\text{H}_{18}\text{KO}_2^+$ : 377.0938 found 377.0939.

*(E)*-1-(2-Methoxynaphthalen-1-yl)-3-(naphthalen-2-yl)prop-2-en-1-one (**3f**)

Yellow solid, yield = 59 %, mp 107-109 °C;  $^1\text{H}$  NMR ( $\text{CDCl}_3$ , 400 MHz)  $\delta$ : 7.94 (d, 1H,  $J$  = 8.8 Hz, ArH), 7.77-7.85 (m, 6H, ArH), 7.68-7.72 (m, 2H, ArH), 7.43-7.51 (m, 4H, ArH), 7.34-7.39 (m, 2H, ArH), 7.21 (d, 1H,  $J$  = 16.0 Hz,  $\text{COCH}=\text{CH}$ ), 3.94 (s, 3H,  $\text{OCH}_3$ );  $^{13}\text{C}$  NMR ( $\text{CDCl}_3$ , 100 MHz)  $\delta$ : 197.65, 154.22, 146.13, 134.45, 133.31, 132.25, 131.65, 131.39, 130.82, 129.07, 128.93, 128.78, 128.67, 128.21, 127.88, 127.62, 127.50, 126.82, 124.22, 123.76, 123.58, 113.23, 56.77; HRMS (TOF) calcd for  $[\text{M}+\text{Na}]^+ \text{C}_{24}\text{H}_{18}\text{NaO}_2^+$ : 361.1199 found 361.1198.

*(E)*-3-(3-Bromo-4-methoxyphenyl)-1-(2-methoxynaphthalen-1-yl)prop-2-en-1-one (**3g**)

Yellow solid, yield = 60 %, mp 168-169 °C;  $^1\text{H}$  NMR ( $\text{CDCl}_3$ , 400 MHz)  $\delta$ : 7.92 (d, 1H,  $J$  = 8.8 Hz, ArH), 7.81 (d, 1H,  $J$  = 8.4 Hz, ArH), 7.64-7.69 (m, 2H, ArH), 7.41-7.45 (m, 2H, ArH), 7.31-7.38 (m, 2H, ArH), 7.18 (d, 1H,  $J$  = 16.0 Hz,  $\text{COCH}=\text{CH}$ ), 7.97 (d,

1H,  $J = 16.0$  Hz, COCH=CH), 6.85 (d, 1H,  $J = 8.4$  Hz, ArH), 3.92 (s, 3H, OCH<sub>3</sub>), 3.91 (s, 3H, OCH<sub>3</sub>); <sup>13</sup>C NMR (CDCl<sub>3</sub>, 100 MHz)  $\delta$ : 197.41, 157.68, 154.09, 144.31, 133.32, 131.55, 131.38, 129.39, 128.85, 128.69, 128.21, 127.79, 127.60, 124.11, 123.39, 113.08, 112.28, 111.82, 77.46, 77.14, 76.82, 56.72, 56.51; HRMS (TOF) calcd for [M+K]<sup>+</sup> C<sub>21</sub>H<sub>17</sub>BrKO<sub>3</sub><sup>+</sup>: 434.9993 found 434.9994.

*(E)*-1-(2-Methoxynaphthalen-1-yl)-3-(3-methoxyphenyl)prop-2-en-1-one (**3h**)

Yellow solid, yield = 42 %, mp 109-110 °C; <sup>1</sup>H NMR (CDCl<sub>3</sub>, 400 MHz)  $\delta$ : 7.93 (d, 1H,  $J = 8.8$  Hz, ArH), 7.81 (d, 1H,  $J = 8.4$  Hz, ArH), 7.66 (d, 1H,  $J = 8.0$  Hz, ArH), 7.42-7.46 (m, 1H, ArH), 7.36-7.39 (m, 1H, ArH), 7.24-7.34 (m, 3H, ArH), 7.08 (d, 1H,  $J = 16.0$  Hz, COCH=CH), 7.07 (d, 1H,  $J = 8.0$  Hz, ArH), 7.00-7.01 (m, 1H, ArH), 6.90 (dd, 1H,  $J = 8.0$  Hz, 2.0 Hz, ArH), 3.92 (s, 3H, OCH<sub>3</sub>), 3.79 (s, 3H, OCH<sub>3</sub>); <sup>13</sup>C NMR (CDCl<sub>3</sub>, 100 MHz)  $\delta$ : 197.70, 159.92, 154.20, 145.95, 136.06, 131.59, 131.41, 129.96, 129.14, 128.87, 128.19, 127.63, 124.16, 123.42, 121.34, 116.75, 113.18, 77.45, 77.13, 76.81, 56.72, 55.41; HRMS (TOF) calcd for [M+Na]<sup>+</sup> C<sub>21</sub>H<sub>18</sub>NaO<sub>3</sub><sup>+</sup>: 341.1148 found 341.1149.

*(E)*-3-(4-Methoxy-3-nitrophenyl)-1-(2-methoxynaphthalen-1-yl)prop-2-en-1-one (**3i**)

Yellow solid, yield = 55 %, mp 157-159 °C; <sup>1</sup>H NMR (CDCl<sub>3</sub>, 400 MHz)  $\delta$ : 7.95 (d, 1H,  $J = 8.8$  Hz, ArH), 7.95 (d, 1H,  $J = 2.0$  Hz, ArH), 7.83 (d, 1H,  $J = 8.0$  Hz, ArH), 7.70 (dd, 1H,  $J = 8.8$  Hz, 2.0 Hz, ArH), 7.67 (d, 1H,  $J = 8.4$  Hz, ArH), 7.46 (dt, 1H,  $J = 8.0$  Hz, 1.2 Hz, ArH), 7.38 (t, 1H,  $J = 8.4$  Hz, ArH), 7.33 (d, 1H,  $J = 8.8$  Hz, ArH), 7.26 (d, 1H,  $J = 16.0$  Hz, COCH=CH), 7.09 (d, 1H,  $J = 8.8$  Hz, ArH), 7.05 (d, 1H,  $J = 16.0$  Hz, COCH=CH), 3.99 (s, 3H, OCH<sub>3</sub>), 3.94 (s, 3H, OCH<sub>3</sub>); <sup>13</sup>C NMR (CDCl<sub>3</sub>, 100 MHz)  $\delta$ :

196.94, 154.31, 142.46, 139.76, 133.87, 131.72, 131.48, 129.12, 128.88, 128.30, 127.75, 127.43, 125.72, 124.22, 123.96, 123.03, 114.00, 113.86, 113.10, 56.89, 56.71; HRMS (TOF) calcd for  $[M+Na]^+$   $C_{21}H_{17}NNaO_5^+$ : 386.0999 found 386.0999.

**(E)-1-(2-Methoxynaphthalen-1-yl)-3-(thiophen-2-yl)prop-2-en-1-one (3j)**

Yellow solid, yield = 65 %, mp 149-150 °C;  $^1H$  NMR ( $CDCl_3$ , 400 MHz)  $\delta$ : 7.92 (d, 1H,  $J$  = 8.8 Hz, ArH), 7.81 (d, 1H,  $J$  = 8.0 Hz, ArH), 7.67 (d, 1H,  $J$  = 8.8 Hz, ArH), 7.31-7.46 (m, 5H, ArH), 7.17 (d, 1H,  $J$  = 3.6 Hz, ArH), 7.01 (dd, 1H,  $J$  = 4.8 Hz, 3.6 Hz, ArH), 6.90 (d, 1H,  $J$  = 16.0 Hz, COCH=CH), 3.92 (s, 3H, OCH<sub>3</sub>);  $^{13}C$  NMR ( $CDCl_3$ , 100 MHz)  $\delta$ : 197.06, 154.18, 140.09, 138.41, 131.95, 131.59, 131.39, 129.47, 128.86, 128.39, 128.18, 127.86, 127.62, 124.21, 124.18, 123.30, 113.16, 56.73; HRMS (TOF) calcd for  $[M+Na]^+$   $C_{18}H_{14}NaO_2S^+$ : 317.0607 found 317.0607.

**(E)-3-(4-Chlorophenyl)-1-(2-methoxynaphthalen-1-yl)prop-2-en-1-one (3k)**

Yellow solid, yield = 58 %, mp 142-143 °C;  $^1H$  NMR ( $CDCl_3$ , 400 MHz)  $\delta$ : 7.93 (d, 1H,  $J$  = 8.8 Hz, ArH), 7.81 (d, 1H,  $J$  = 8.0 Hz, ArH), 7.66 (d, 1H,  $J$  = 8.4 Hz, ArH), 7.41-7.46 (m, 3H, ArH), 7.36-7.39 (m, 1H, ArH), 7.33-7.35 (m, 2H, ArH), 7.31 (d, 1H,  $J$  = 2.4 Hz, ArH), 7.26 (d, 1H,  $J$  = 16.0 Hz, COCH=CH), 7.06 (d, 1H,  $J$  = 16.0 Hz, COCH=CH), 3.92 (s, 3H, OCH<sub>3</sub>);  $^{13}C$  NMR ( $CDCl_3$ , 100 MHz)  $\delta$ : 197.31, 154.28, 144.23, 136.56, 133.21, 131.57, 129.75, 129.25, 128.88, 128.23, 127.69, 124.26, 124.08, 123.28, 113.11, 77.44, 77.13, 76.81, 56.72; HRMS (TOF) calcd for  $[M+Na]^+$   $C_{20}H_{15}ClNaO_2^+$ : 345.0653 found 345.0653.

**(E)-1-(2-Methoxynaphthalen-1-yl)-3-(2,4,5-trimethoxyphenyl)prop-2-en-1-one (3l)**

Yellow solid, yield = 63 %, mp 147-149 °C;  $^1H$  NMR ( $CDCl_3$ , 400 MHz)  $\delta$ : 7.92 (d,

1H,  $J = 8.8$  Hz, ArH), 7.82 (d, 1H,  $J = 8.0$  Hz, ArH), 7.70 (d, 1H,  $J = 8.4$  Hz, ArH), 7.63 (d, 1H,  $J = 16.0$  Hz, COCH=CH), 7.44 (t, 1H,  $J = 8.0$  Hz, ArH), 7.36 (t, 1H,  $J = 8.0$  Hz, ArH), 7.33 (d, 1H,  $J = 8.8$  Hz, ArH), 7.07 (d, 1H,  $J = 16.0$  Hz, COCH=CH), 7.02 (s, 1H, ArH), 6.44 (s, 1H, ArH), 3.93 (s, 3H, OCH<sub>3</sub>), 3.91 (s, 3H, OCH<sub>3</sub>), 3.84 (s, 3H, OCH<sub>3</sub>), 3.76 (s, 3H, OCH<sub>3</sub>); <sup>13</sup>C NMR (CDCl<sub>3</sub>, 100 MHz)  $\delta$ : 198.01, 154.46, 153.93, 152.62, 143.26, 141.44, 131.71, 130.95, 128.92, 128.07, 127.34, 127.01, 124.44, 124.17, 115.09, 113.46, 110.85, 110.01, 96.72, 56.83, 56.45, 56.41, 56.14; HRMS (TOF) calcd for [M+Na]<sup>+</sup> C<sub>23</sub>H<sub>22</sub>NaO<sub>5</sub><sup>+</sup>: 401.1359 found 401.1360.

*(E)*-3-(2-Fluorophenyl)-1-(2-methoxynaphthalen-1-yl)prop-2-en-1-one (**3m**)

Yellow solid, yield = 59 %, mp 146-147 °C; <sup>1</sup>H NMR (CDCl<sub>3</sub>, 400 MHz)  $\delta$ : 7.93 (d, 1H,  $J = 8.8$  Hz, ArH), 7.81 (d, 1H,  $J = 8.0$  Hz, ArH), 7.69 (d, 1H,  $J = 8.4$  Hz, ArH), 7.56 (dt, 1H,  $J = 8.0$  Hz, 1.2 Hz, ArH), 7.49 (d, 1H,  $J = 16.0$  Hz, COCH=CH), 7.45 (dt, 1H,  $J = 8.0$  Hz, 1.2 Hz, ArH), 7.31-7.38 (m, 3H, ArH), 7.18 (d, 1H,  $J = 16.0$  Hz, COCH=CH), 7.14 (t, 1H,  $J = 8.0$  Hz, ArH), 7.02-7.07 (m, 1H, ArH), 3.93 (s, 3H, OCH<sub>3</sub>); <sup>13</sup>C NMR (CDCl<sub>3</sub>, 100 MHz)  $\delta$ : 197.48, 160.21 (d, 1C,  $J = 253.2$  Hz), 154.41, 137.91, 132.05 (d, 1C,  $J = 8.7$  Hz), 131.65, 131.57 (d, 1C,  $J = 8.1$  Hz), 130.93 (d, 1C,  $J = 6.0$  Hz), 129.23, 129.21, 128.93, 128.24, 127.67, 124.53 (d, 1C,  $J = 3.6$  Hz), 124.23, 124.10, 123.21, 122.82 (d, 1C,  $J = 11.4$  Hz), 116.17 (d, 1C,  $J = 21.7$  Hz), 113.13, 56.69; HRMS (TOF) calcd for [M+Na]<sup>+</sup> C<sub>20</sub>H<sub>15</sub>FNaO<sub>2</sub><sup>+</sup>: 329.0948 found 329.0948.

*(E)*-1-(2-Methoxynaphthalen-1-yl)-3-phenylprop-2-en-1-one (**3n**)

Yellow solid, yield = 61 %, mp 142-144 °C; <sup>1</sup>H NMR (CDCl<sub>3</sub>, 400 MHz)  $\delta$ : 7.93 (d, 1H,  $J = 8.8$  Hz, ArH), 7.82 (d, 1H,  $J = 8.4$  Hz, ArH), 7.69 (d, 1H,  $J = 8.4$  Hz, ArH),

7.48-7.50 (m, 2H, ArH), 7.44 (dt, 1H,  $J = 8.0$  Hz, 1.2 Hz, ArH), 7.35-7.38 (m, 4H, ArH), 7.30 (d, 1H,  $J = 7.2$  Hz, ArH), 7.11 (d, 1H,  $J = 16.0$  Hz, COCH=CH), 3.93 (s, 3H, OCH<sub>3</sub>); <sup>13</sup>C NMR (CDCl<sub>3</sub>, 100 MHz)  $\delta$ : 197.73, 154.20, 146.06, 134.69, 131.60, 131.41, 130.73, 128.99, 128.89, 128.63, 128.20, 127.62, 124.21, 123.45, 113.17, 77.47, 77.15, 76.83, 56.72; HRMS (TOF) calcd for [M+Na]<sup>+</sup> C<sub>20</sub>H<sub>16</sub>NaO<sub>2</sub><sup>+</sup>: 311.1043 found 311.1044.

*(E)*-3-(3-Fluorophenyl)-1-(2-methoxynaphthalen-1-yl)prop-2-en-1-one (**3o**)

Yellow solid, yield = 66 %, mp 142-143 °C; <sup>1</sup>H NMR (CDCl<sub>3</sub>, 400 MHz)  $\delta$ : 7.94 (d, 1H,  $J = 8.8$  Hz, ArH), 7.82 (d, 1H,  $J = 8.0$  Hz, ArH), 7.67 (d, 1H,  $J = 8.8$  Hz, ArH), 7.45 (dt, 1H,  $J = 8.0$  Hz, 1.2 Hz, ArH), 7.27-7.39 (m, 5H, ArH), 7.18-7.21 (m, 1H, ArH), 7.08 (d, 1H,  $J = 16.0$  Hz, COCH=CH), 7.03-7.06 (m, 1H, ArH), 3.93 (s, 3H, OCH<sub>3</sub>); <sup>13</sup>C NMR (CDCl<sub>3</sub>, 100 MHz)  $\delta$ : <sup>13</sup>C NMR (101 MHz, )  $\delta$  197.24, 161.80 (d, 1C,  $J = 245.7$  Hz), 154.36, 144.07, 136.97 (d, 1C,  $J = 7.6$  Hz), 131.66, 131.53, 130.46 (d, 1C,  $J = 8.6$  Hz), 129.92, 128.88, 128.25, 127.73, 124.56 (d, 1C,  $J = 2.3$  Hz), 124.27, 124.05, 123.19, 117.37 (d, 1C,  $J = 21.5$  Hz), 114.65 (d, 1C,  $J = 21.8$  Hz), 113.08, 56.70; HRMS (TOF) calcd for [M+K]<sup>+</sup> C<sub>20</sub>H<sub>15</sub>FKO<sub>2</sub><sup>+</sup>: 345.0688 found 345.0689.

*(E)*-1-(2-Methoxynaphthalen-1-yl)-3-(3,4,5-trimethoxyphenyl)prop-2-en-1-one (**3p**)

Yellow solid, yield = 49 %, mp 113-114 °C; <sup>1</sup>H NMR (CDCl<sub>3</sub>, 400 MHz)  $\delta$ : 7.93 (d, 1H,  $J = 8.8$  Hz, ArH), 7.82 (d, 1H,  $J = 8.0$  Hz, ArH), 7.65 (d, 1H,  $J = 8.4$  Hz, ArH), 7.44 (dt, 1H,  $J = 8.0$  Hz, 1.2 Hz, ArH), 7.36-7.39 (m, 1H, ArH), 7.33 (d, 1H,  $J = 8.8$  Hz, ArH), 7.18 (d, 1H,  $J = 16.0$  Hz, COCH=CH), 7.00 (d, 1H,  $J = 16.0$  Hz, COCH=CH), 6.71 (s, 2H, ArH), 3.92 (s, 3H, OCH<sub>3</sub>), 3.85 (s, 3H, OCH<sub>3</sub>), 3.83 (s, 6H, OCH<sub>3</sub>); <sup>13</sup>C NMR (CDCl<sub>3</sub>, 100 MHz)  $\delta$ : 197.53, 154.11, 153.48, 146.20, 140.51, 131.63, 131.23, 130.13,

128.89, 128.37, 128.15, 127.59, 124.23, 124.20, 123.61, 113.31, 105.75, 61.06, 56.80, 56.24; HRMS (TOF) calcd for  $[M+K]^+ C_{23}H_{22}KO_5^+$ : 417.1099 found 417.1099.

*(E)*-1-(2-Methoxynaphthalen-1-yl)-3-(2-methoxyphenyl)prop-2-en-1-one (**3q**)

Yellow solid, yield = 62 %, mp 124-126 °C;  $^1H$  NMR ( $CDCl_3$ , 400 MHz)  $\delta$ : 7.91 (d, 1H,  $J$  = 8.8 Hz, ArH), 7.80 (d, 1H,  $J$  = 8.4 Hz, ArH), 7.69 (d, 1H,  $J$  = 8.4 Hz, ArH), 7.66 (d, 1H,  $J$  = 16.0 Hz, COCH=CH), 7.49 (dd, 1H,  $J$  = 8.0 Hz, 1.6 Hz, ArH), 7.43 (dt, 1H,  $J$  = 8.0 Hz, 1.2 Hz, ArH), 7.32-7.37 (m, 3H, ArH), 7.21 (d, 1H,  $J$  = 16.0 Hz, COCH=CH), 6.93 (t, 1H,  $J$  = 8.0 Hz, ArH), 6.85 (d, 1H,  $J$  = 8.4 Hz, ArH), 3.91 (s, 3H, OCH<sub>3</sub>), 3.78 (s, 3H, OCH<sub>3</sub>);  $^{13}C$  NMR ( $CDCl_3$ , 100 MHz)  $\delta$ : 198.22, 158.68, 154.16, 141.59, 132.00, 131.68, 131.22, 129.41, 128.93, 128.13, 127.45, 124.36, 124.11, 123.85, 123.61, 120.77, 113.29, 111.22, 77.47, 77.16, 76.84, 56.77, 55.53; HRMS (TOF) calcd for  $[M+K]^+ C_{21}H_{18}KO_3^+$ : 357.0888 found 357.0886.

*(E)*-3-(4-(Dimethylamino)phenyl)-1-(2-methoxynaphthalen-1-yl)prop-2-en-1-one (**3r**)

Yellow solid, yield = 57 %, mp 147-148 °C;  $^1H$  NMR ( $CDCl_3$ , 400 MHz)  $\delta$ : 7.89 (d, 1H,  $J$  = 8.8 Hz, ArH), 7.80 (d, 1H,  $J$  = 8.4 Hz, ArH), 7.67 (d, 1H,  $J$  = 8.4 Hz, ArH), 7.31-7.43 (m, 5H, ArH), 7.20 (d, 1H,  $J$  = 16.0 Hz, COCH=CH), 6.93 (d, 1H,  $J$  = 16.0 Hz, COCH=CH), 6.62 (d, 2H,  $J$  = 8.4 Hz, ArH), 3.91 (s, 3H, OCH<sub>3</sub>), 3.00 (s, 6H, NCH<sub>3</sub>);  $^{13}C$  NMR ( $CDCl_3$ , 100 MHz)  $\delta$ : 197.70, 153.77, 147.73, 131.76, 130.75, 130.58, 128.87, 128.04, 127.31, 124.52, 124.23, 124.04, 113.35, 111.90, 56.79, 40.31; HRMS (TOF) calcd for  $[M+Na]^+ C_{22}H_{21}NNaO_2^+$ : 354.1465 found 354.1466.

*(E)*-3-(4-(Diethylamino)phenyl)-1-(2-methoxynaphthalen-1-yl)prop-2-en-1-one (**3s**)

Yellow solid, yield = 64 %, mp 142-144 °C;  $^1H$  NMR ( $CDCl_3$ , 400 MHz)  $\delta$ : 7.89 (d,

1H,  $J = 8.8$  Hz, ArH), 7.80 (d, 1H,  $J = 8.0$  Hz, ArH), 7.67 (d, 1H,  $J = 8.4$  Hz, ArH), 7.40 (dt, 1H,  $J = 8.0$  Hz, 1.2 Hz, ArH), 7.31-7.35 (m, 4H, ArH), 7.17 (d, 1H,  $J = 16.0$  Hz, COCH=CH), 6.90 (d, 1H,  $J = 16.0$  Hz, COCH=CH), 6.56 (d, 2H,  $J = 8.8$  Hz, ArH), 3.90 (s, 3H, OCH<sub>3</sub>), 3.34 (q, 4H,  $J = 7.2$  Hz, NCH<sub>2</sub>CH<sub>3</sub>), 1.15 (t, 6H,  $J = 7.2$  Hz, NCH<sub>2</sub>CH<sub>3</sub>); <sup>13</sup>C NMR (CDCl<sub>3</sub>, 100 MHz)  $\delta$ : 197.70, 153.72, 149.77, 147.97, 131.79, 130.93, 130.65, 128.86, 128.00, 127.26, 124.57, 124.34, 124.01, 123.57, 121.35, 113.36, 111.24, 56.78, 44.61, 12.65; HRMS (TOF) calcd for [M+K]<sup>+</sup> C<sub>24</sub>H<sub>25</sub>KNO<sub>2</sub><sup>+</sup>: 398.1517 found 398.1518.

(*E*)-3-(3-Amino-4-methoxyphenyl)-1-(2-methoxynaphthalen-1-yl)prop-2-en-1-one (**3t**)

Yellow oil, yield = 43 %; <sup>1</sup>H NMR (CDCl<sub>3</sub>, 400 MHz)  $\delta$ : 7.90 (d, 1H,  $J = 8.8$  Hz, ArH), 7.79 (d, 1H,  $J = 8.0$  Hz, ArH), 7.64 (d, 1H,  $J = 8.4$  Hz, ArH), 7.41 (dt, 1H,  $J = 8.0$  Hz, 1.2 Hz, ArH), 7.34 (dt, 1H,  $J = 8.0$  Hz, 1.2 Hz, ArH), 7.29 (d, 1H,  $J = 7.2$  Hz, ArH), 7.15 (d, 1H,  $J = 16.0$  Hz, COCH=CH), 6.96 (d, 1H,  $J = 2.0$  Hz, ArH), 6.92 (d, 1H,  $J = 16.0$  Hz, COCH=CH), 6.88 (dd, 1H,  $J = 8.4$  Hz, 1.2 Hz, ArH), 6.71 (d, 1H,  $J = 8.8$  Hz, ArH), 4.10 (s, 2H, NH<sub>2</sub>), 3.89 (s, 3H, OCH<sub>3</sub>), 3.83 (s, 3H, OCH<sub>3</sub>); <sup>13</sup>C NMR (CDCl<sub>3</sub>, 100 MHz)  $\delta$ : 197.86, 153.99, 150.34, 146.77, 134.58, 131.63, 131.13, 128.85, 128.13, 127.68, 127.48, 126.81, 124.27, 124.13, 123.69, 122.30, 114.78, 113.23, 110.36, 77.46, 77.14, 76.83, 56.72, 55.75; HRMS (ESI) calcd for [M+H]<sup>+</sup> C<sub>21</sub>H<sub>20</sub>NO<sub>3</sub><sup>+</sup>: 334.1438 found 334.1438.

## 1.2 *In vitro* anticancer assay

Human breast carcinoma (MCF-7) cells were seeded in 96-well plates at  $1 \times 10^4$  cells/well, and cultured in RPMI-1640 with 10% fetal bovine serum for 24 h. Then,

different concentrations (0.3125, 0.625, 1.25, 2.5, 5.0, 10 and 20  $\mu\text{M}$ ) of the tested compounds (**3a-3f**) or positive control (cisplatin) were added. After 48 h of culture, the culture medium was removed, and cells were incubated with tetrazolium dye [3-(4,5-dimethylthiazol-2-yl)-2,5-diphenyltetrazolium bromide (MTT) solution for 4 h. Then, the supernatant was removed and the precipitates (formazan crystal) were dissolved in DMSO. The optical densities (OD) at a wavelength of 570 nm were measured by the Spectramax M5 Microtiter Plate Luminometer (Molecular Devices, USA).

### **1.3 *In vitro* tubulin polymerization assay**

To evaluate the effect of the compound **3a** on tubulin assembly *in vitro*, varying concentrations of compound **3a**, colchicine (Aladdin, Shanghai, China) or vehicle DMSO were incubated with purified tubulin protein in PEM buffer [100 mM PIPES (1,4-Piperazinediethanesulfonic acid), 1 mM  $\text{MgCl}_2$ , and 1 mM EGTA(ethylene glycol tetraacetic acid)] containing 1 mM GTP and 5 % glycerol. Tubulin assembly was monitored by a spectrophotometer (SPECTRA MAX 190) in absorbance at 340 nm for 20 minutes.

### **1.4 Cell cycle analysis**

MCF-7 cells were seeded in 6-well plates and incubated at 37 °C for overnight and treatment with DMSO or compound **3a** (0.5, 2.0 and 10.0  $\mu\text{M}$ ) for 24 h. The cells were washed twice with PBS, and incubated for 0.5 h at 37 °C in a PBS solution containing 1 mg/mL RNase A and propidium iodide (PI). Cell cycle was analyzed by flow cytometry (TASC240, USA).

### **1.5 Apoptosis assay**

MCF-7 cells were grown in 6-well plates and treated with compound **3a** (0.5, 2.0 and 10.0  $\mu$ M) or DMSO for 24 h. After treatment, the cells were collected and stained with PI (propidium iodide) for 20 min. Apoptosis was analyzed using a flow cytometer.

### **1.6 Docking studies**

The 3D structure of tubulin (1SA0) was downloaded from the Protein Data Bank ([www.rcsb.org](http://www.rcsb.org)). The docking procedure was performed using Autodock vina 1.1.2. The search grid of the tubulin was identified as center\_x: 118.921, center\_y: 89.718, and center\_z: 5.932 with dimensions size\_x: 15, size\_y: 15, and size\_z: 15. The result of molecular docking study was visualized using PyMOL

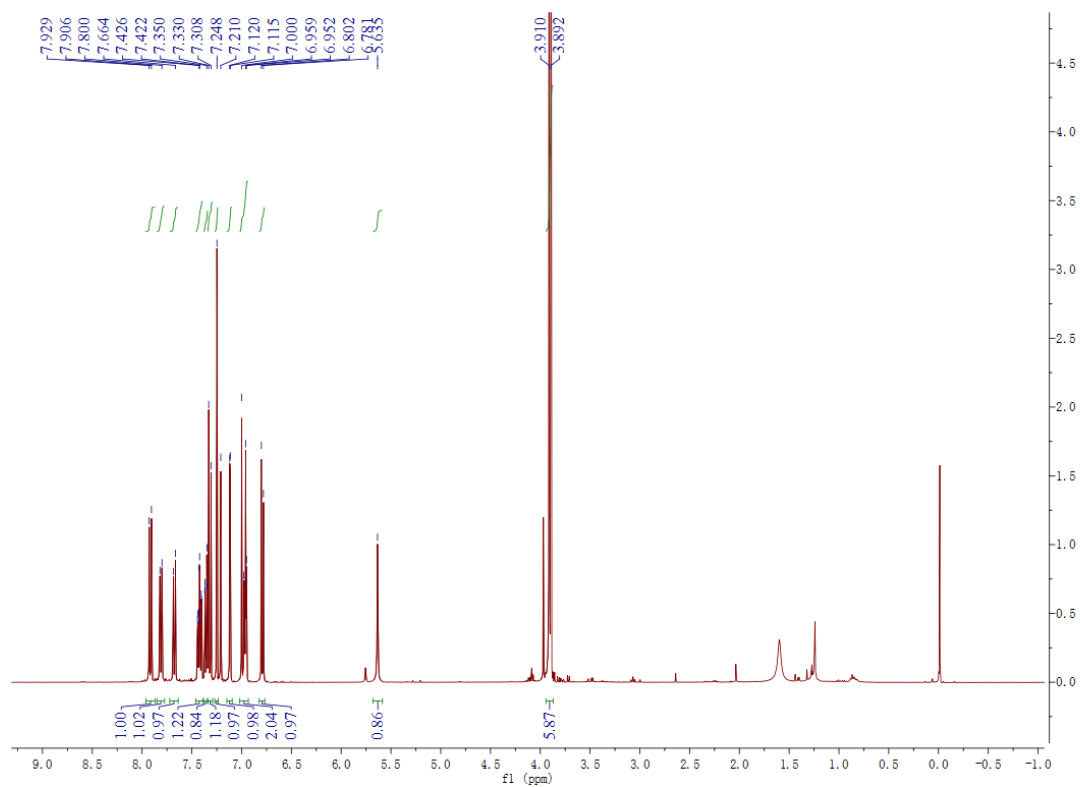

**Figure S1: <sup>1</sup>H NMR of Compound 3a**

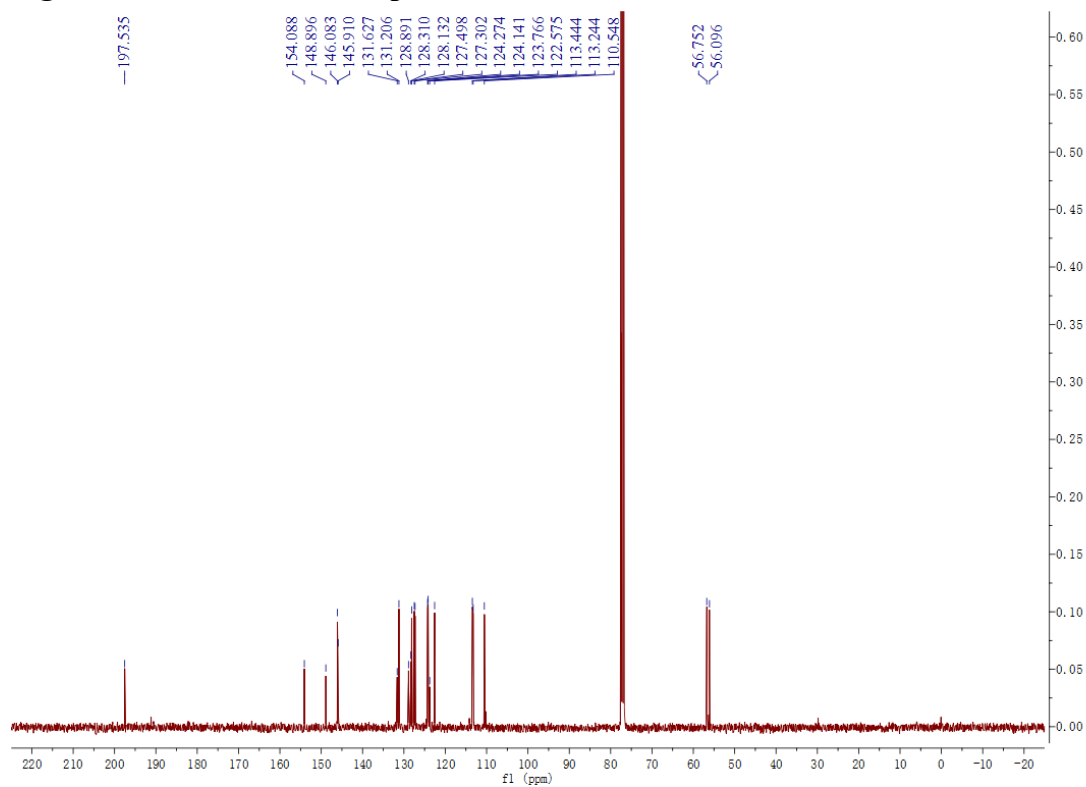

**Figure S2: <sup>13</sup>C NMR of Compound 3a**

## Mass Spectrum SmartFormula Report

### Analysis Info

Analysis Name D:\2019.10.11\liuwenjing\w4-1.d  
Method 20180330pos.m  
Sample Name w4-1  
Comment

Acquisition Date 10/9/2019 2:30:23 PM

Operator BDAL@DE  
Instrument micrOTOF-Q II 228888.10354

### Acquisition Parameter

|             |          |                       |           |                  |           |
|-------------|----------|-----------------------|-----------|------------------|-----------|
| Source Type | ESI      | Ion Polarity          | Positive  | Set Nebulizer    | 1.2 Bar   |
| Focus       | Active   | Set Capillary         | 4500 V    | Set Dry Heater   | 180 °C    |
| Scan Begin  | 50 m/z   | Set End Plate Offset  | -500 V    | Set Dry Gas      | 6.0 l/min |
| Scan End    | 1500 m/z | Set Collision Cell RF | 400.0 Vpp | Set Divert Valve | Waste     |

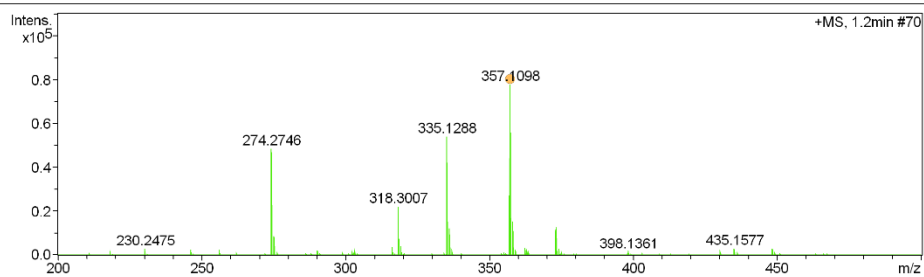

**Figure S3: HRMS of Compound 3a**

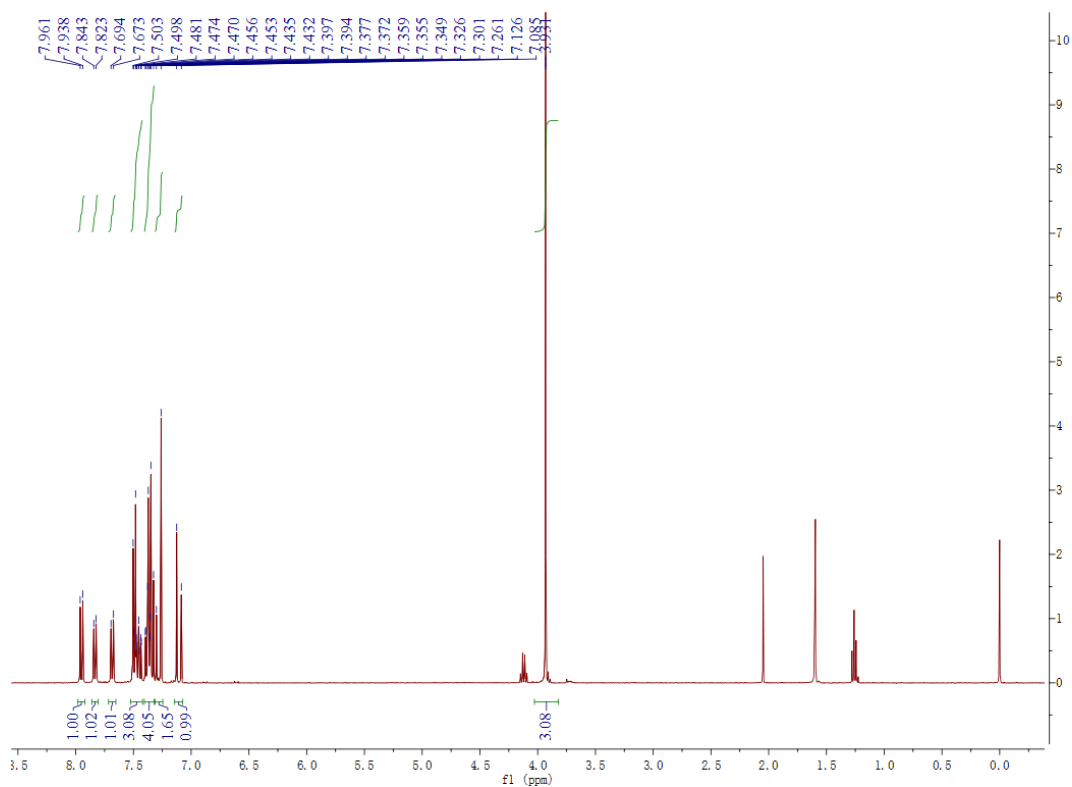

**Figure S4: <sup>1</sup>H NMR of Compound 3b**

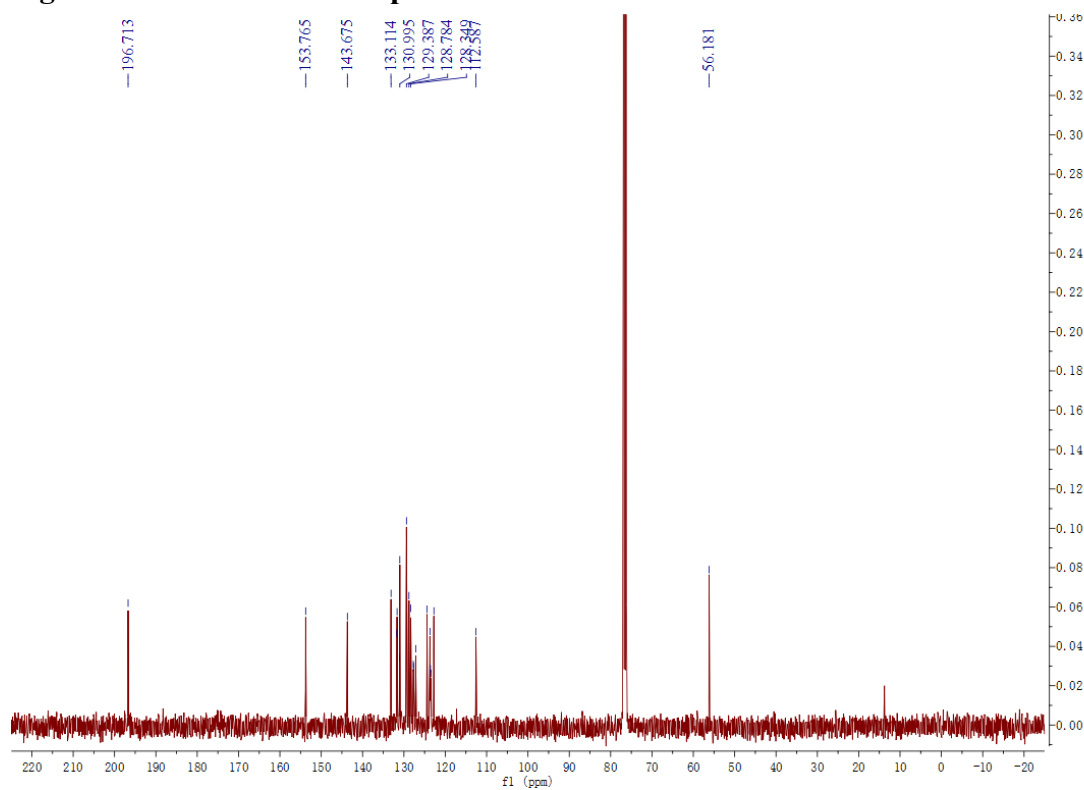

**Figure S5: <sup>13</sup>C NMR of Compound 3b**

## Mass Spectrum SmartFormula Report

### Analysis Info

Analysis Name D:\2019.10.11\liuwenjing\w4--2-9.d  
Method 20180630pos.m  
Sample Name w4--2-9  
Comment

Acquisition Date 10/10/2019 4:22:22 PM

Operator BDAL@DE  
Instrument micrOTOF-Q II 228888.10354

### Acquisition Parameter

|             |          |                       |           |                  |           |
|-------------|----------|-----------------------|-----------|------------------|-----------|
| Source Type | ESI      | Ion Polarity          | Positive  | Set Nebulizer    | 1.4 Bar   |
| Focus       | Active   | Set Capillary         | 4500 V    | Set Dry Heater   | 180 °C    |
| Scan Begin  | 50 m/z   | Set End Plate Offset  | -500 V    | Set Dry Gas      | 8.0 l/min |
| Scan End    | 1500 m/z | Set Collision Cell RF | 400.0 Vpp | Set Divert Valve | Source    |

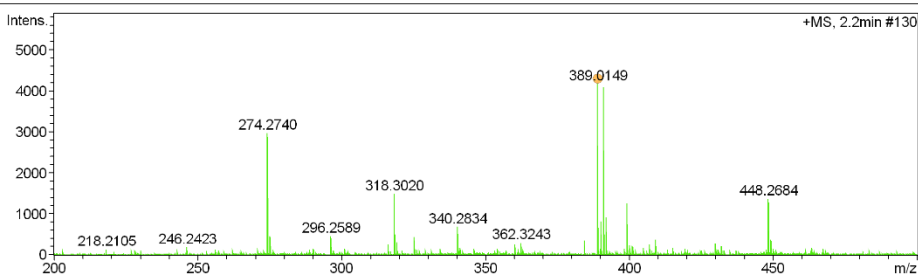

**Figure S6: HRMS of Compound 3b**

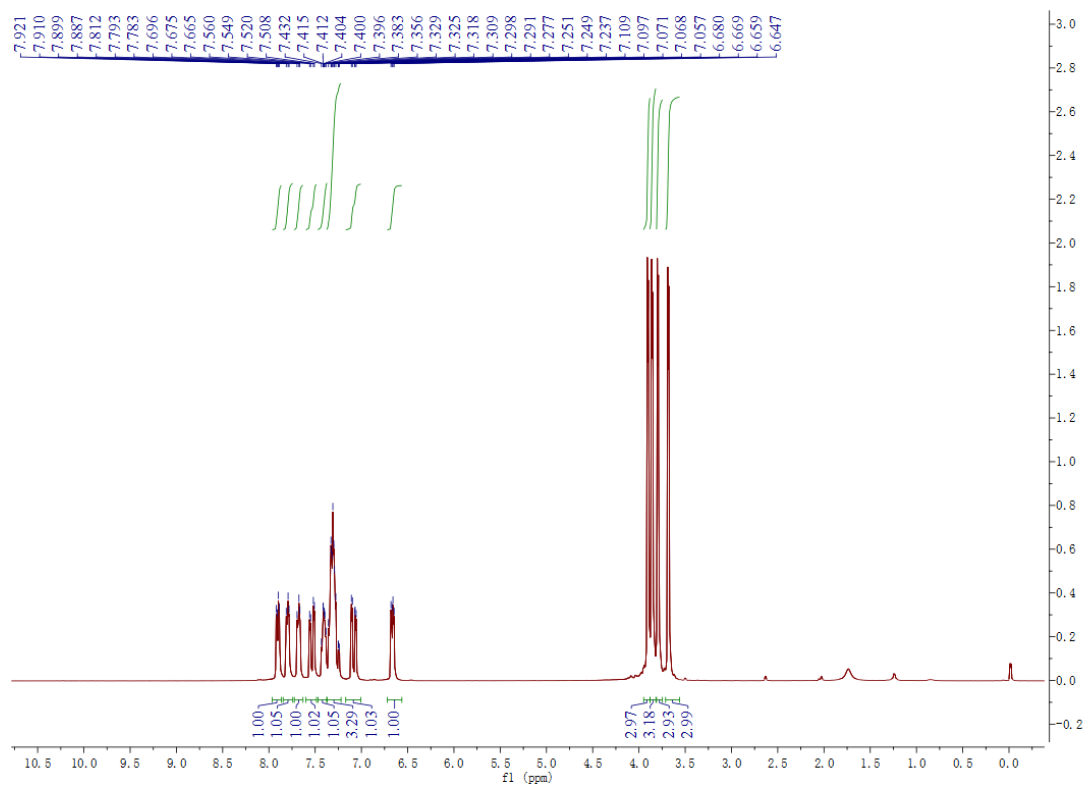

**Figure S7:  $^1\text{H}$  NMR of Compound 3c**

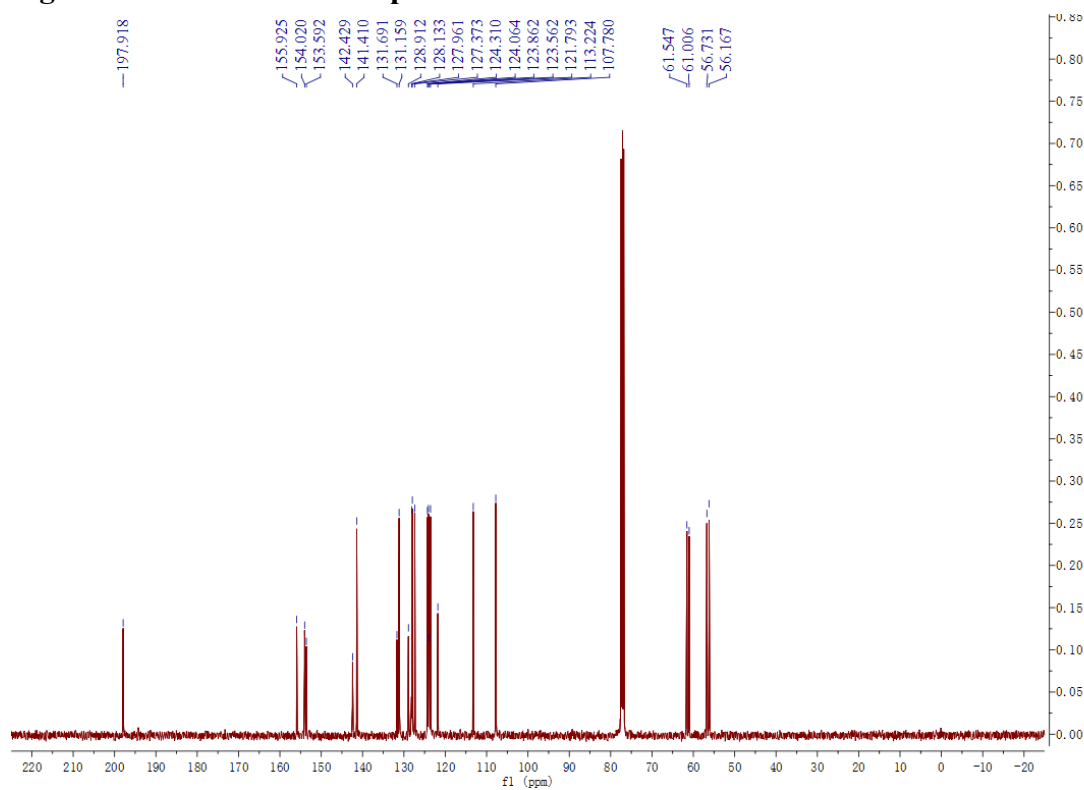

**Figure S8:  $^{13}\text{C}$  NMR of Compound 3c**

## Mass Spectrum SmartFormula Report

### Analysis Info

Analysis Name D:\2019.10.11\liuwenjing\w4-3.d  
Method 20180330pos.m  
Sample Name w4-3  
Comment

Acquisition Date 10/9/2019 2:50:02 PM

Operator BDAL@DE  
Instrument micrOTOF-Q II 228888.10354

### Acquisition Parameter

|             |          |                       |           |                  |           |
|-------------|----------|-----------------------|-----------|------------------|-----------|
| Source Type | ESI      | Ion Polarity          | Positive  | Set Nebulizer    | 1.2 Bar   |
| Focus       | Active   | Set Capillary         | 4500 V    | Set Dry Heater   | 180 °C    |
| Scan Begin  | 50 m/z   | Set End Plate Offset  | -500 V    | Set Dry Gas      | 6.0 l/min |
| Scan End    | 1500 m/z | Set Collision Cell RF | 400.0 Vpp | Set Divert Valve | Waste     |

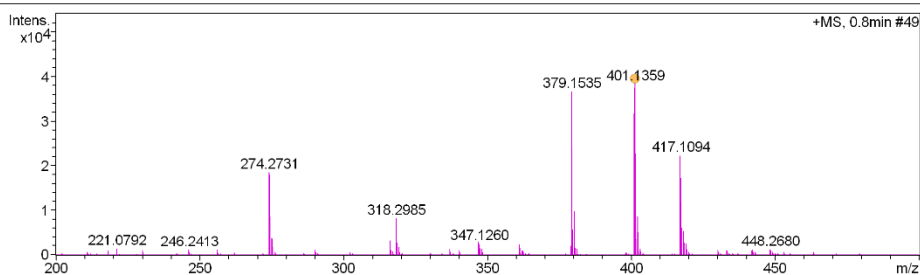

| Meas. m/z | # | Ion Formula                                      | m/z      | err [ppm] | mSigma | # mSigma | Score  | rdB  | e <sup>-</sup> Conf | N-Rule |
|-----------|---|--------------------------------------------------|----------|-----------|--------|----------|--------|------|---------------------|--------|
| 401.1359  | 1 | C <sub>23</sub> H <sub>22</sub> NaO <sub>5</sub> | 401.1359 | 0.1       | 13.8   | 1        | 100.00 | 12.5 | even                | ok     |

**Figure S9: HRMS of Compound 3c**

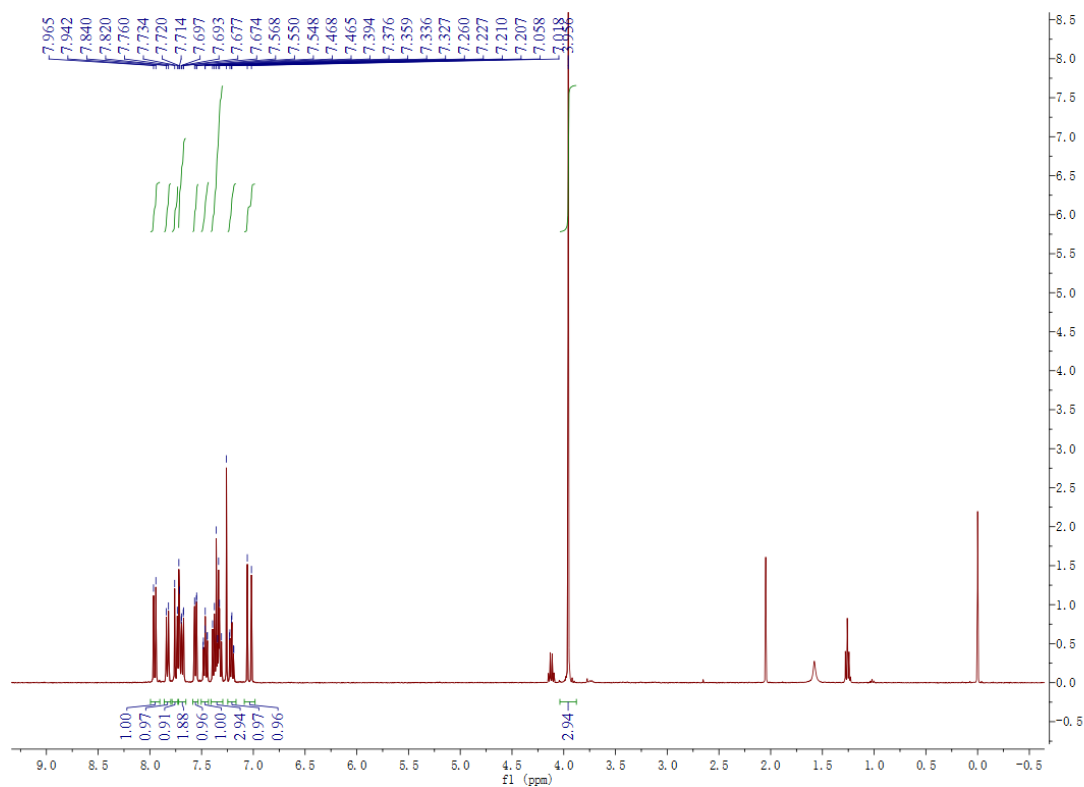

**Figure S10: <sup>1</sup>H NMR of Compound 3d**

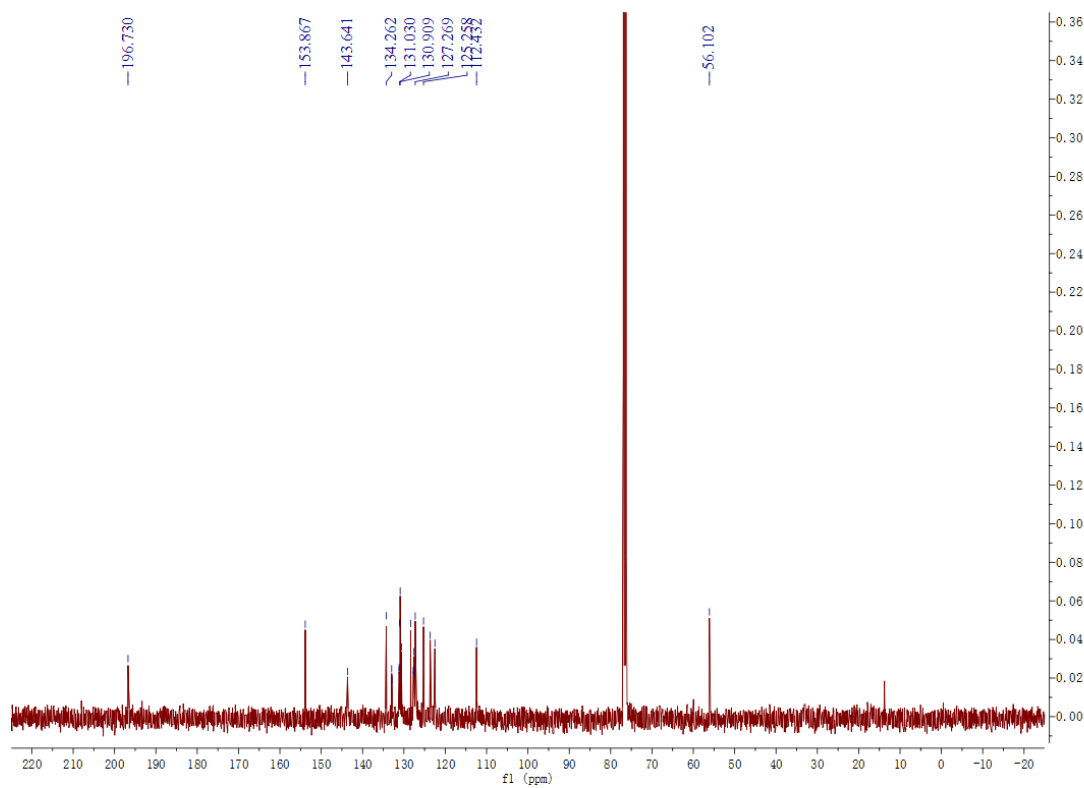

**Figure S11 : <sup>13</sup>C NMR of Compound 3d**

## Mass Spectrum SmartFormula Report

### Analysis Info

Analysis Name D:\2019.10.11\luwenjing\w4--4-6.d  
Method 20180630pos.m  
Sample Name w4--4-6  
Comment

Acquisition Date 10/10/2019 4:51:29 PM

Operator BDAL@DE  
Instrument micrOTOF-Q II 228888.10354

### Acquisition Parameter

|             |          |                       |           |                  |           |
|-------------|----------|-----------------------|-----------|------------------|-----------|
| Source Type | ESI      | Ion Polarity          | Positive  | Set Nebulizer    | 1.4 Bar   |
| Focus       | Active   | Set Capillary         | 4500 V    | Set Dry Heater   | 180 °C    |
| Scan Begin  | 50 m/z   | Set End Plate Offset  | -500 V    | Set Dry Gas      | 8.0 l/min |
| Scan End    | 1500 m/z | Set Collision Cell RF | 400.0 Vpp | Set Divert Valve | Source    |

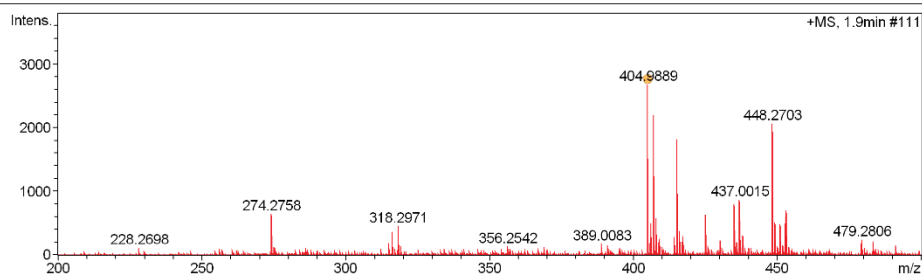

**Figure S12: HRMS of Compound 3d**

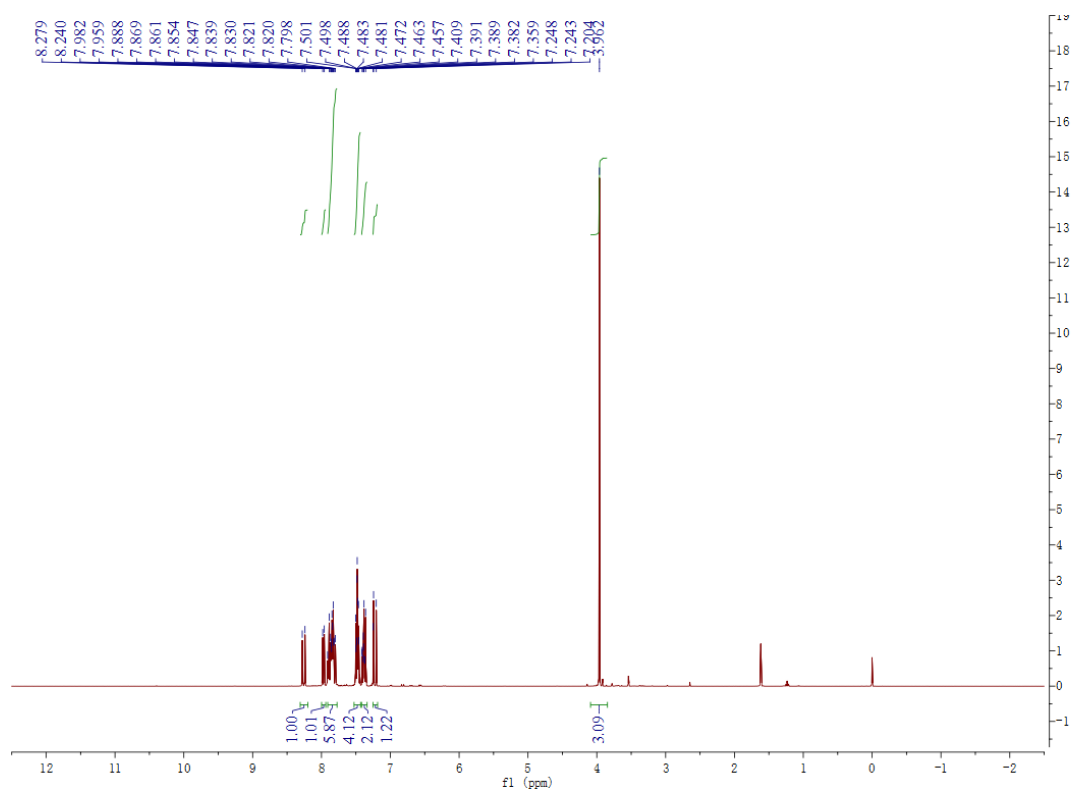

**Figure S13 : <sup>1</sup>H NMR of Compound 3e**

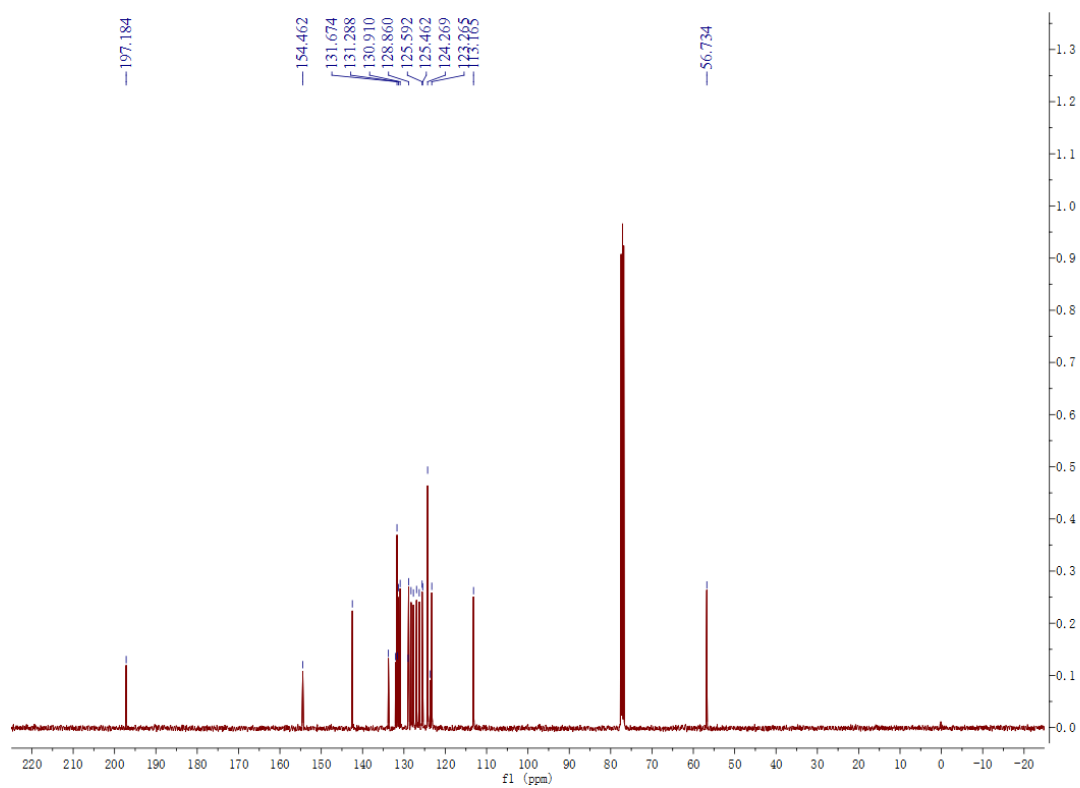

**Figure S14 : <sup>13</sup>C NMR of Compound 3e**

## Mass Spectrum SmartFormula Report

### Analysis Info

Analysis Name D:\2019.10.11\liuwenjing\w4--5-2.d  
Method 20180330pos.m  
Sample Name w4-5-2  
Comment

Acquisition Date 10/9/2019 4:15:08 PM

Operator BDAL@DE  
Instrument micrOTOF-Q II 228888.10354

### Acquisition Parameter

|             |          |                       |           |                  |           |
|-------------|----------|-----------------------|-----------|------------------|-----------|
| Source Type | ESI      | Ion Polarity          | Positive  | Set Nebulizer    | 1.2 Bar   |
| Focus       | Active   | Set Capillary         | 4500 V    | Set Dry Heater   | 180 °C    |
| Scan Begin  | 50 m/z   | Set End Plate Offset  | -500 V    | Set Dry Gas      | 6.0 l/min |
| Scan End    | 1500 m/z | Set Collision Cell RF | 400.0 Vpp | Set Divert Valve | Waste     |

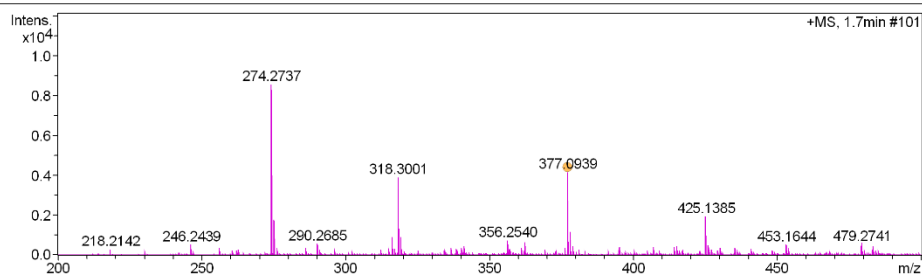

**Figure S15: HRMS of Compound 3e**

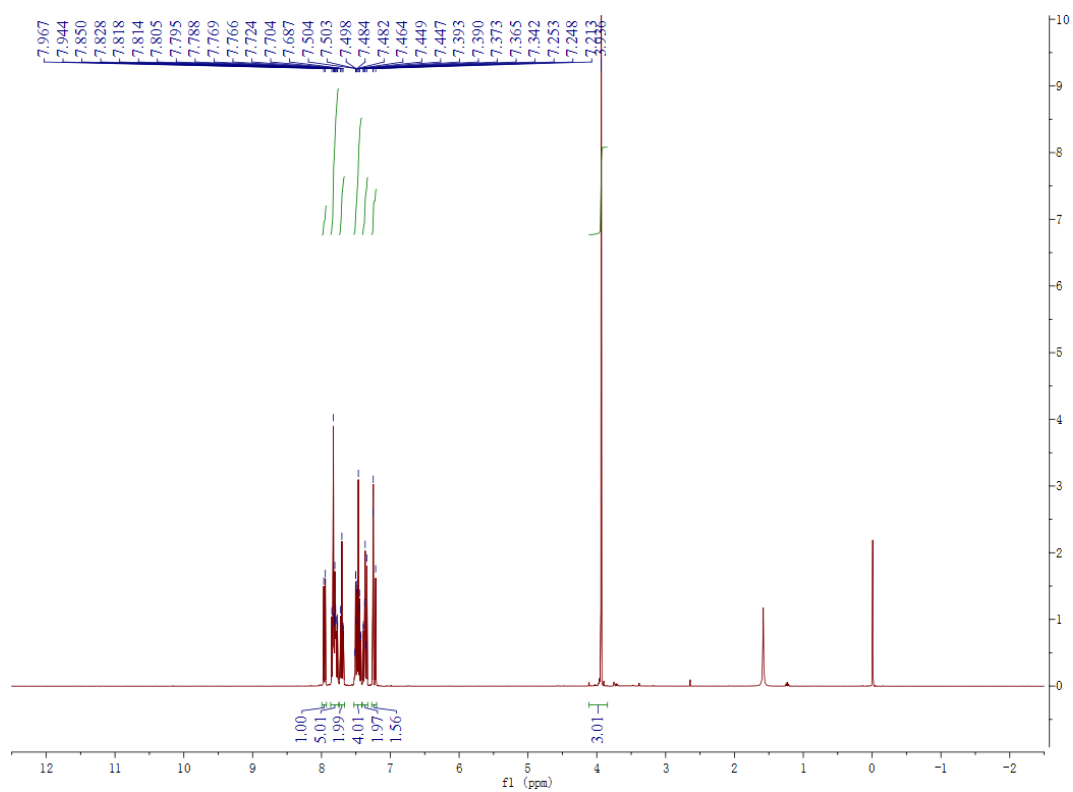

**Figure S16:  $^1\text{H}$  NMR of Compound 3f**

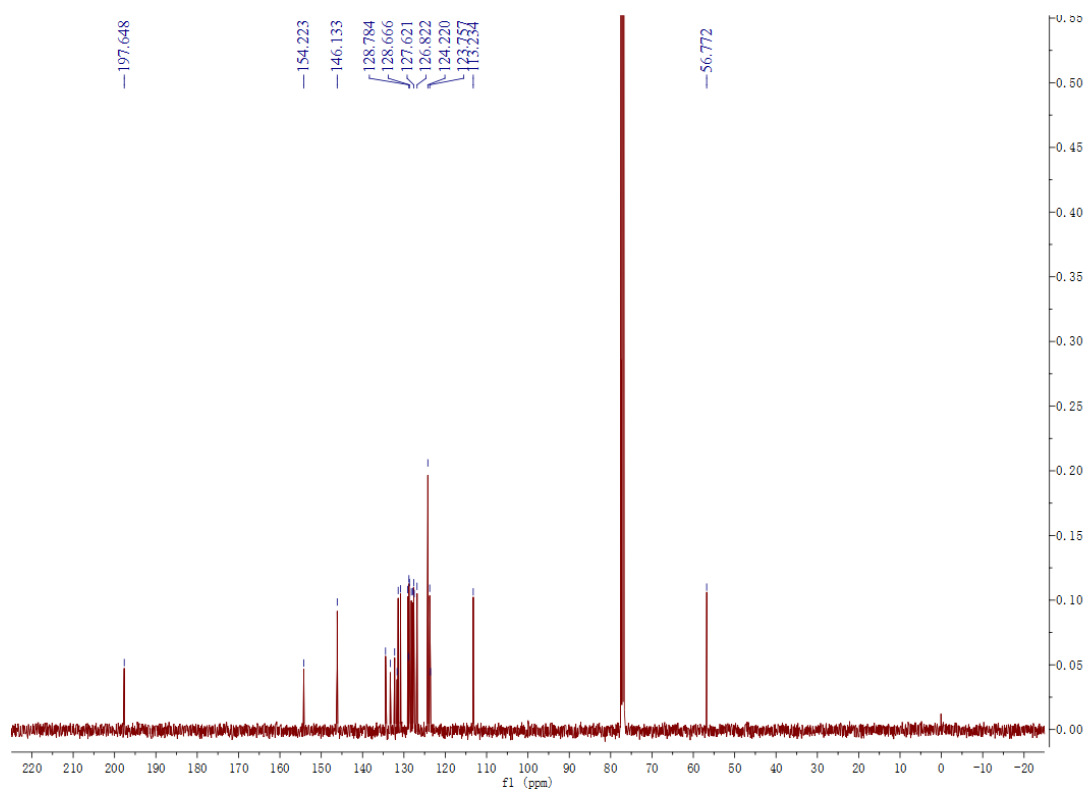

**Figure S17:  $^{13}\text{C}$  NMR of Compound 3f**

## Mass Spectrum SmartFormula Report

### Analysis Info

Analysis Name D:\2019.10.11\liuwenjing\w4-6-2.d  
Method 20180330pos.m  
Sample Name w4-6-2  
Comment

Acquisition Date 10/9/2019 4:11:11 PM

Operator BDAL@DE  
Instrument micrOTOF-Q II 228888.10354

### Acquisition Parameter

|             |          |                       |           |                  |           |
|-------------|----------|-----------------------|-----------|------------------|-----------|
| Source Type | ESI      | Ion Polarity          | Positive  | Set Nebulizer    | 1.2 Bar   |
| Focus       | Active   | Set Capillary         | 4500 V    | Set Dry Heater   | 180 °C    |
| Scan Begin  | 50 m/z   | Set End Plate Offset  | -500 V    | Set Dry Gas      | 6.0 l/min |
| Scan End    | 1500 m/z | Set Collision Cell RF | 400.0 Vpp | Set Divert Valve | Waste     |

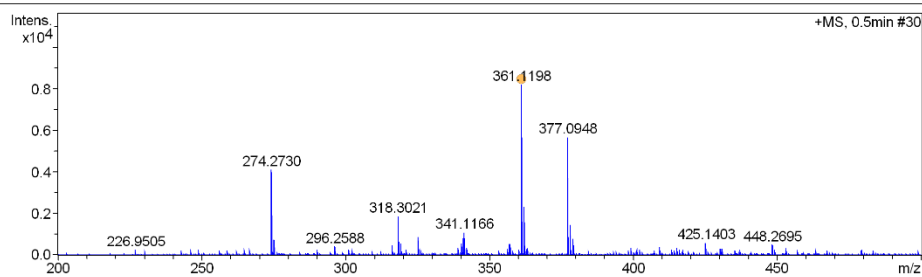

**Figure S18: HRMS of Compound 3f**

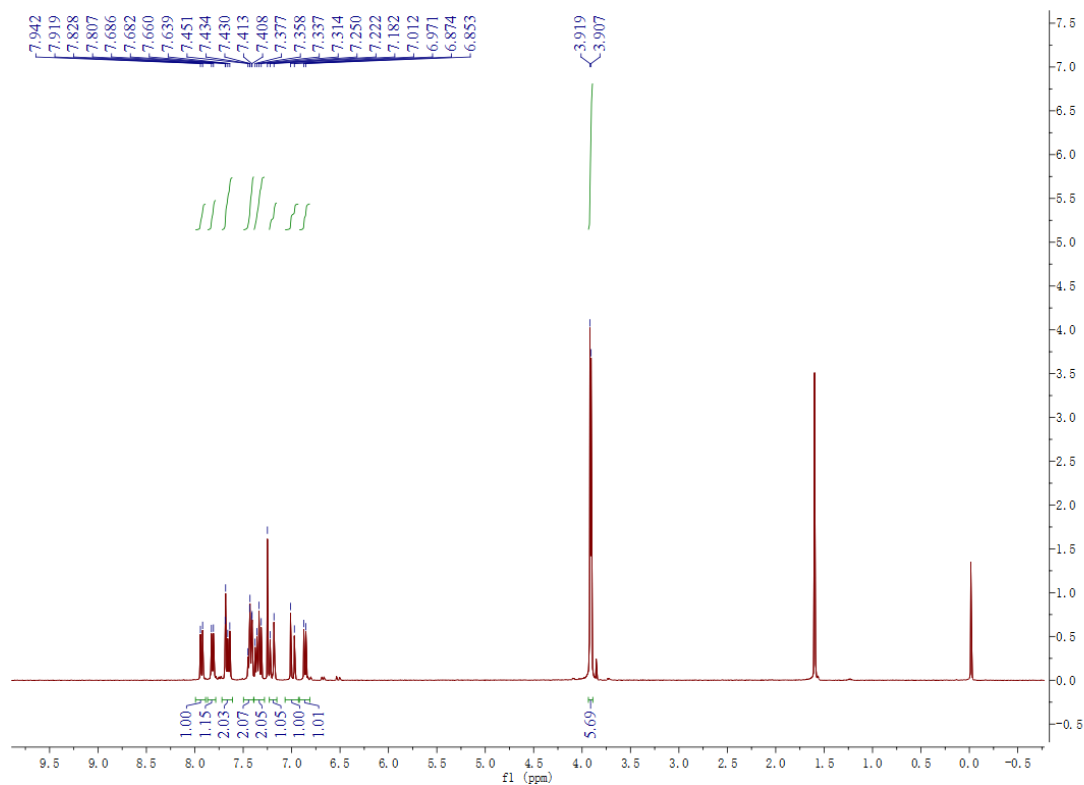

**Figure S19 : <sup>1</sup>H NMR of Compound 3g**

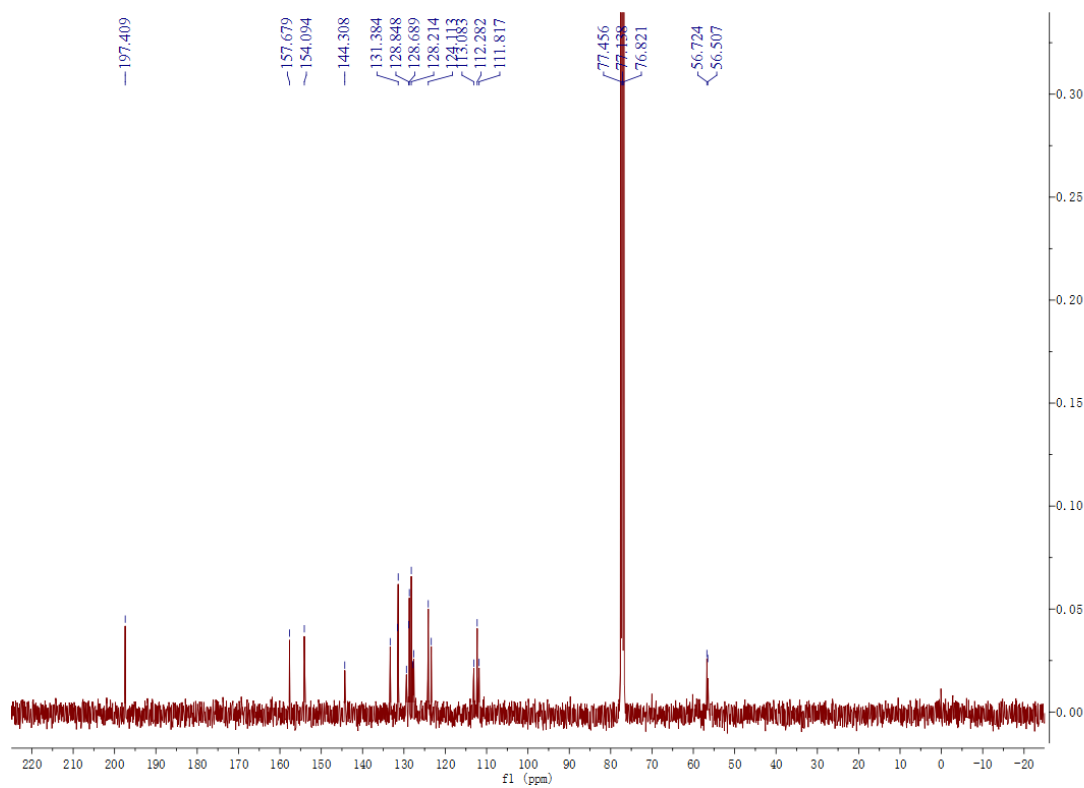

**Figure S20 : <sup>13</sup>C NMR of Compound 3g**

## Mass Spectrum SmartFormula Report

### Analysis Info

Analysis Name D:\2019.10.11\luwenjing\w4-7-18.d  
Method 20180330pos.m  
Sample Name w4-7-18  
Comment

Acquisition Date 10/15/2019 9:43:44 AM

Operator BDAL@DE  
Instrument micrOTOF-Q II 228888.10354

### Acquisition Parameter

|             |          |                       |           |                  |           |
|-------------|----------|-----------------------|-----------|------------------|-----------|
| Source Type | ESI      | Ion Polarity          | Positive  | Set Nebulizer    | 1.2 Bar   |
| Focus       | Active   | Set Capillary         | 4500 V    | Set Dry Heater   | 180 °C    |
| Scan Begin  | 50 m/z   | Set End Plate Offset  | -500 V    | Set Dry Gas      | 6.0 l/min |
| Scan End    | 1500 m/z | Set Collision Cell RF | 400.0 Vpp | Set Divert Valve | Waste     |

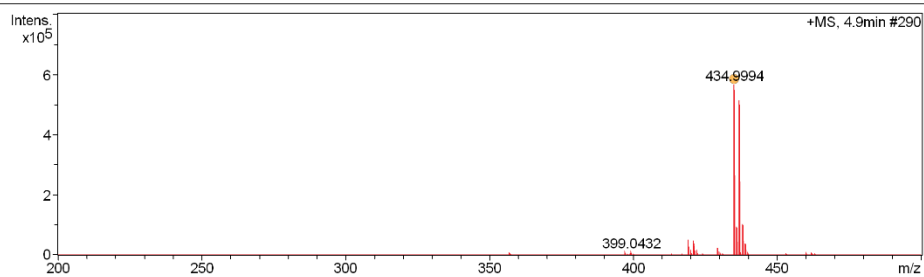

| Meas. m/z | # | Ion Formula                                       | m/z      | err [ppm] | mSigma | # mSigma | Score  | rdb  | e <sup>-</sup> Conf | N-Rule |
|-----------|---|---------------------------------------------------|----------|-----------|--------|----------|--------|------|---------------------|--------|
| 434.9994  | 1 | C <sub>21</sub> H <sub>17</sub> BrKO <sub>3</sub> | 434.9993 | -0.3      | 55.3   | 1        | 100.00 | 12.5 | even                | ok     |

**Figure S21: HRMS of Compound 3g**

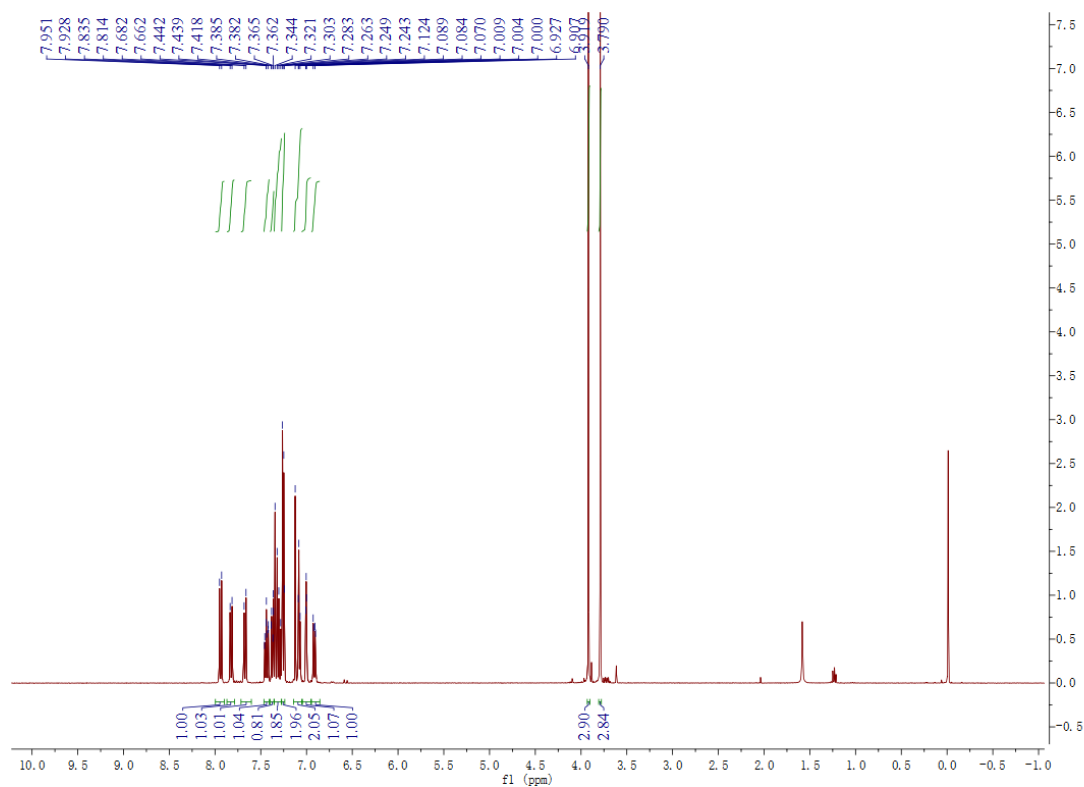

**Figure S22 : <sup>1</sup>H NMR of Compound 3h**

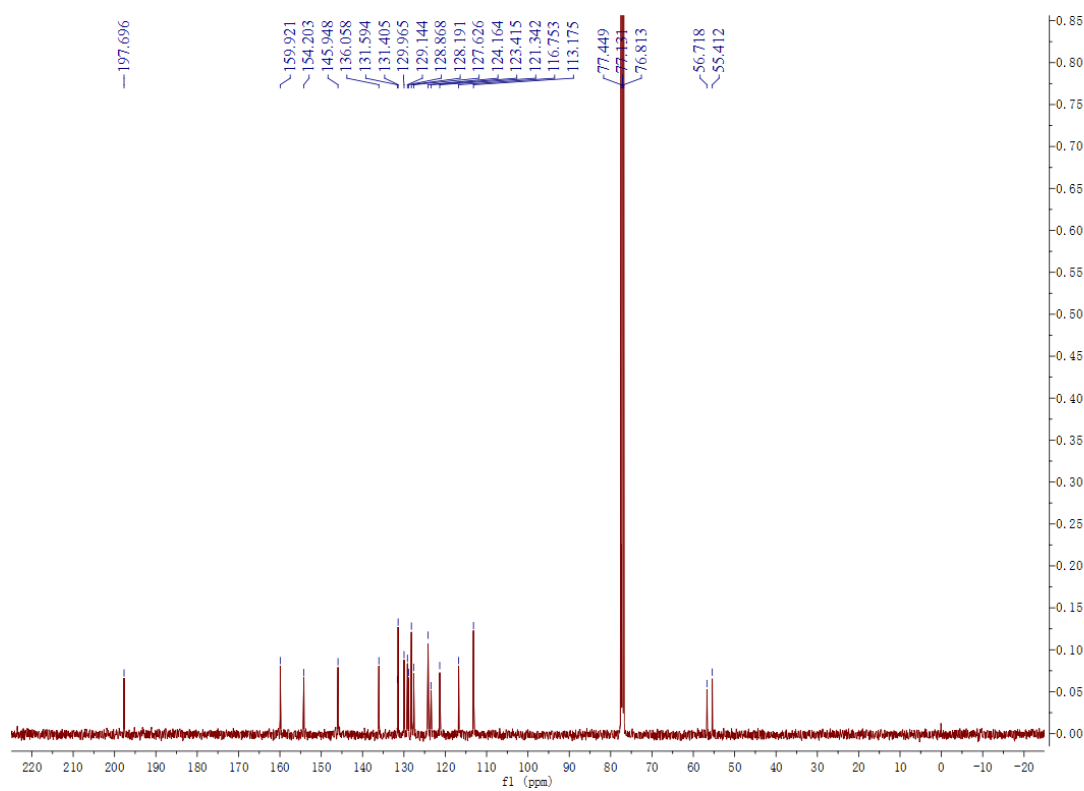

**Figure S23 : <sup>13</sup>C NMR of Compound 3h**

## Mass Spectrum SmartFormula Report

### Analysis Info

Analysis Name D:\2019.10.11\liuwenjing\w4-8-4.d  
Method 20180330pos.m  
Sample Name w4-8-4  
Comment

Acquisition Date 10/9/2019 4:00:47 PM

Operator BDAL@DE  
Instrument micrOTOF-Q II 228888.10354

### Acquisition Parameter

|             |          |                       |           |                  |           |
|-------------|----------|-----------------------|-----------|------------------|-----------|
| Source Type | ESI      | Ion Polarity          | Positive  | Set Nebulizer    | 1.2 Bar   |
| Focus       | Active   | Set Capillary         | 4500 V    | Set Dry Heater   | 180 °C    |
| Scan Begin  | 50 m/z   | Set End Plate Offset  | -500 V    | Set Dry Gas      | 6.0 l/min |
| Scan End    | 1500 m/z | Set Collision Cell RF | 400.0 Vpp | Set Divert Valve | Waste     |

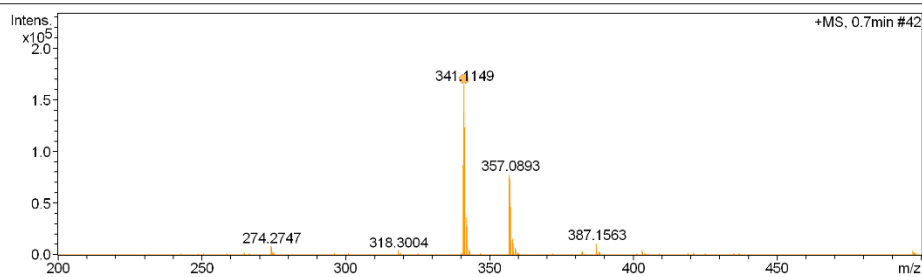

| Meas. m/z | # | Ion Formula                                      | m/z      | err [ppm] | mSigma | # mSigma | Score  | rdb  | e <sup>-</sup> | Conf | N-Rule |
|-----------|---|--------------------------------------------------|----------|-----------|--------|----------|--------|------|----------------|------|--------|
| 341.1149  | 1 | C <sub>21</sub> H <sub>18</sub> NaO <sub>3</sub> | 341.1148 | -0.3      | 4.9    | 1        | 100.00 | 12.5 | even           |      | ok     |

**Figure S24: HRMS of Compound 3h**

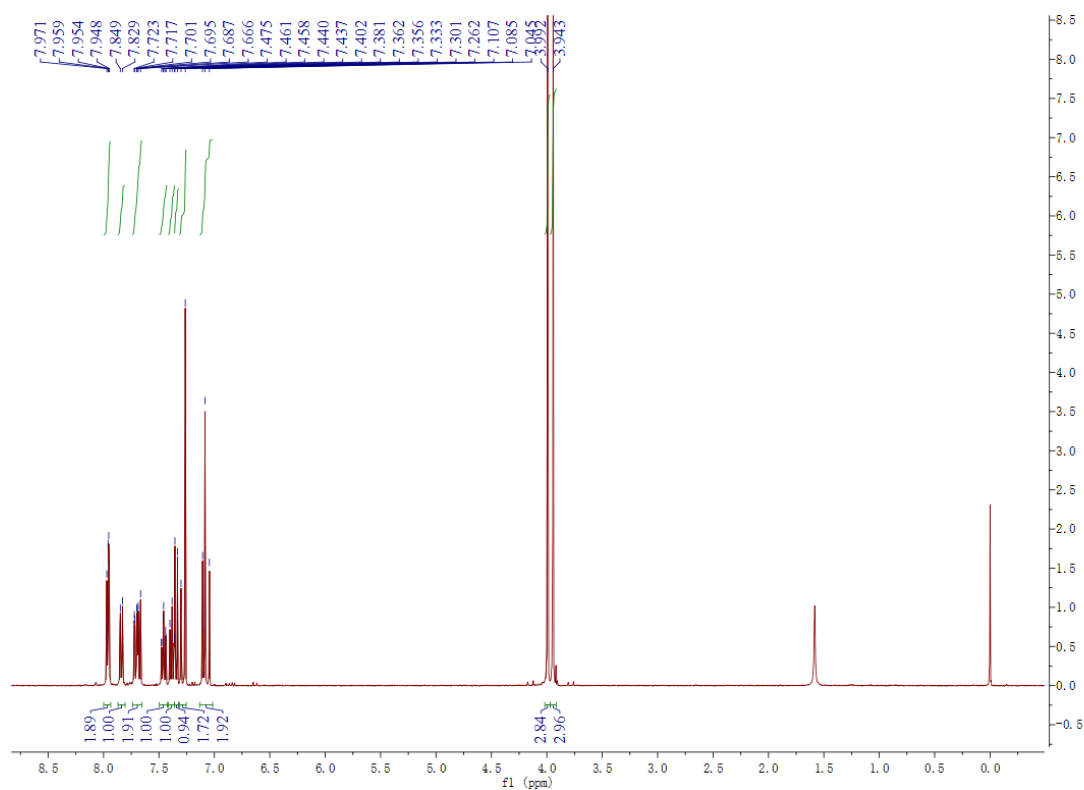

**Figure S25:  $^1\text{H}$  NMR of Compound 3i**

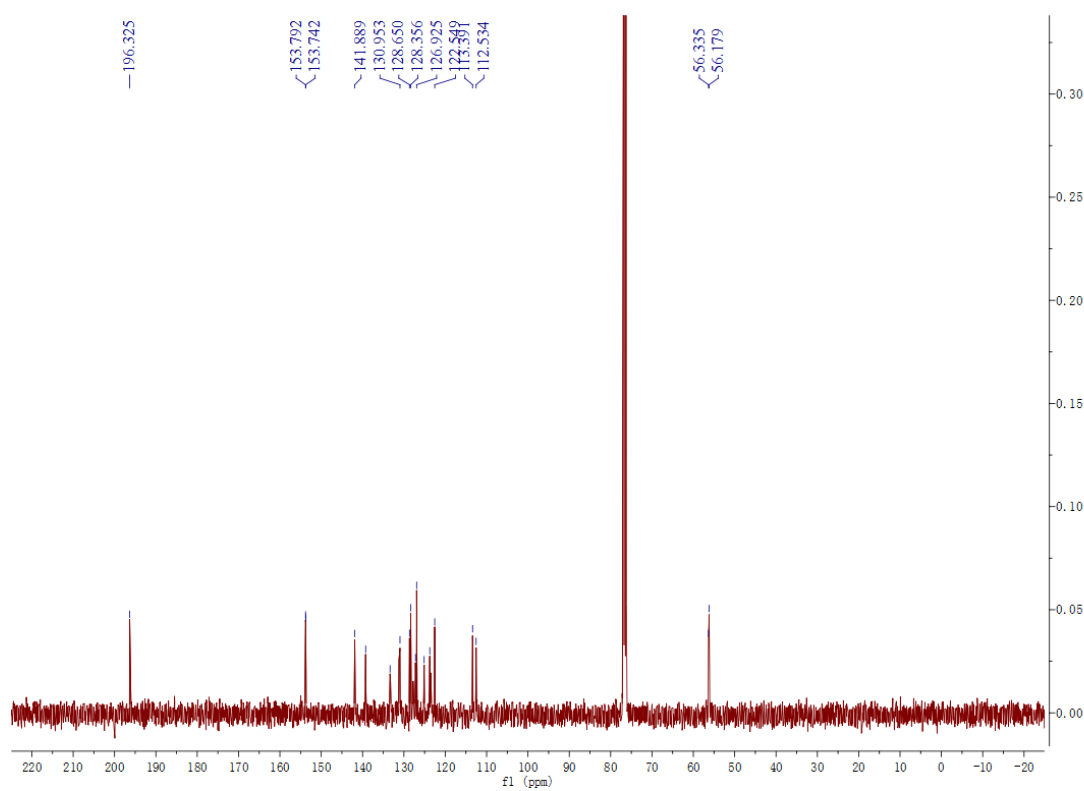

**Figure S26 :  $^{13}\text{C}$  NMR of Compound 3i**

## Mass Spectrum SmartFormula Report

### Analysis Info

Analysis Name D:\2019.10.11\liuwenjing\w4-9-2.d  
Method 20180330pos.m  
Sample Name w4-9-2  
Comment

Acquisition Date 10/9/2019 3:51:38 PM

Operator BDAL@DE  
Instrument micrOTOF-Q II 228888.10354

### Acquisition Parameter

|             |          |                       |           |                  |           |
|-------------|----------|-----------------------|-----------|------------------|-----------|
| Source Type | ESI      | Ion Polarity          | Positive  | Set Nebulizer    | 1.2 Bar   |
| Focus       | Active   | Set Capillary         | 4500 V    | Set Dry Heater   | 180 °C    |
| Scan Begin  | 50 m/z   | Set End Plate Offset  | -500 V    | Set Dry Gas      | 6.0 l/min |
| Scan End    | 1500 m/z | Set Collision Cell RF | 400.0 Vpp | Set Divert Valve | Waste     |

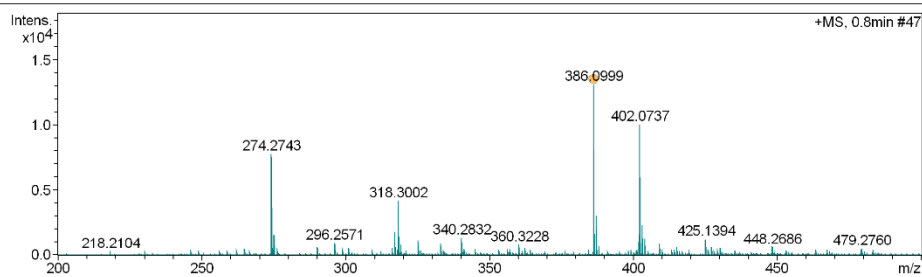

| Meas. m/z | # | Ion Formula                                       | m/z      | err [ppm] | mSigma | # mSigma | Score  | rdB  | e <sup>-</sup> Conf | N-Rule |
|-----------|---|---------------------------------------------------|----------|-----------|--------|----------|--------|------|---------------------|--------|
| 386.0999  | 1 | C <sub>21</sub> H <sub>17</sub> NNaO <sub>5</sub> | 386.0999 | -0.1      | 9.2    | 1        | 100.00 | 13.5 | even                | ok     |

**Figure S27: HRMS of Compound 3i**

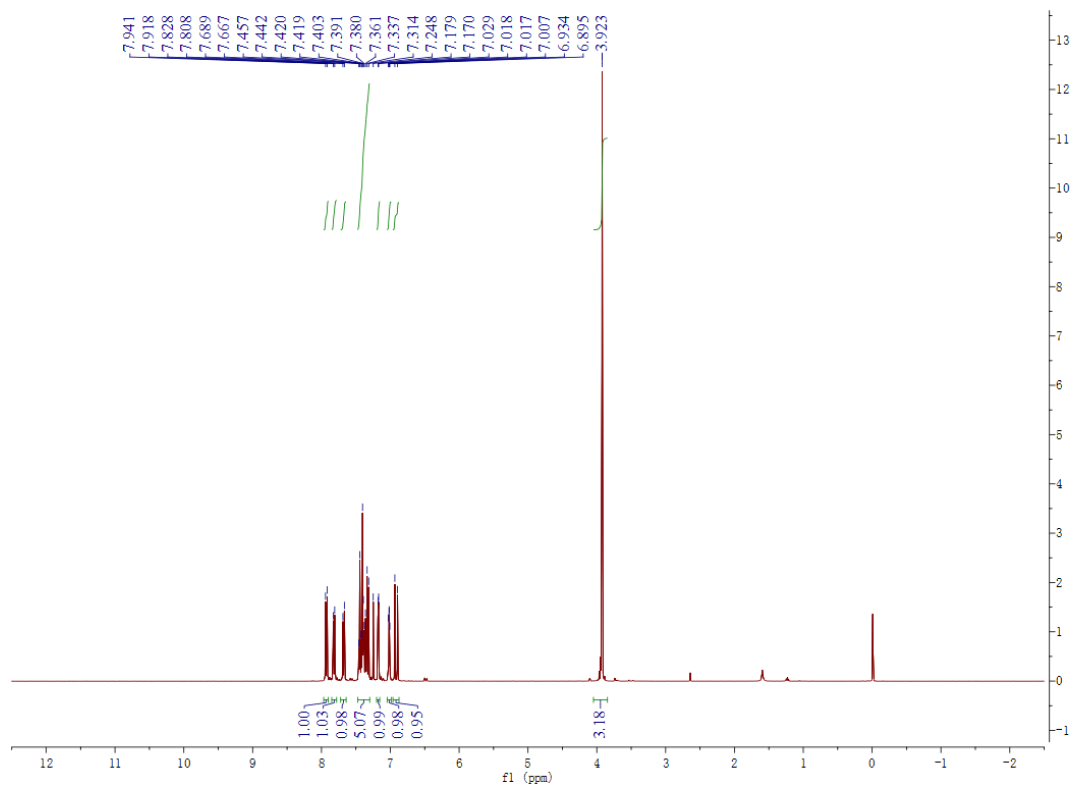

**Figure S28 : <sup>1</sup>H NMR of Compound 3j**

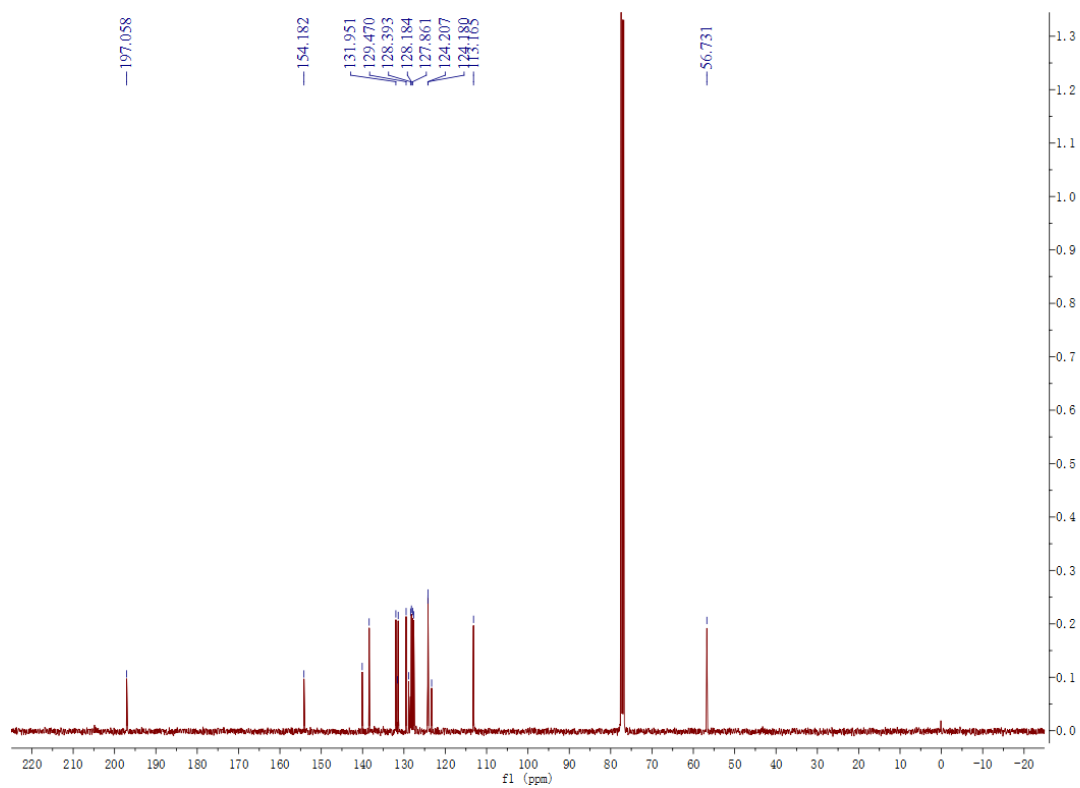

**Figure S29: <sup>13</sup>C NMR of Compound 3j**

## Mass Spectrum SmartFormula Report

### Analysis Info

Analysis Name D:\2019.10.11\liuwenjing\w4-10-2.d  
Method 20180330pos.m  
Sample Name w4-10-2  
Comment

Acquisition Date 10/9/2019 3:43:53 PM

Operator BDAL@DE  
Instrument micrOTOF-Q II 228888.10354

### Acquisition Parameter

|             |          |                       |           |                  |           |
|-------------|----------|-----------------------|-----------|------------------|-----------|
| Source Type | ESI      | Ion Polarity          | Positive  | Set Nebulizer    | 1.2 Bar   |
| Focus       | Active   | Set Capillary         | 4500 V    | Set Dry Heater   | 180 °C    |
| Scan Begin  | 50 m/z   | Set End Plate Offset  | -500 V    | Set Dry Gas      | 6.0 l/min |
| Scan End    | 1500 m/z | Set Collision Cell RF | 400.0 Vpp | Set Divert Valve | Waste     |

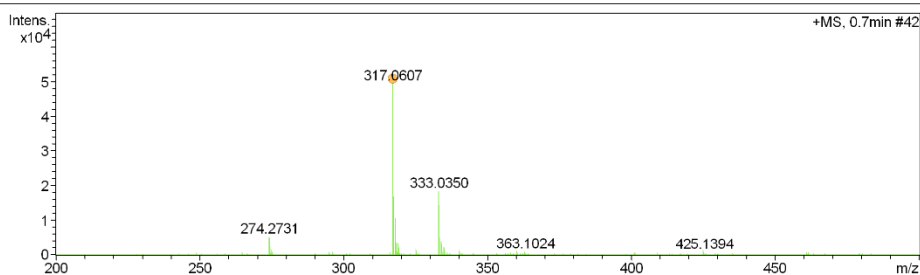

| Meas. m/z | # | Ion Formula                                        | m/z      | err [ppm] | mSigma | # mSigma | Score  | rdB  | e <sup>-</sup> Conf | N-Rule |
|-----------|---|----------------------------------------------------|----------|-----------|--------|----------|--------|------|---------------------|--------|
| 317.0607  | 1 | C <sub>18</sub> H <sub>14</sub> NaO <sub>2</sub> S | 317.0607 | 0.1       | 7.5    | 1        | 100.00 | 11.5 | even                | ok     |

**Figure S30: HRMS of Compound 3j**

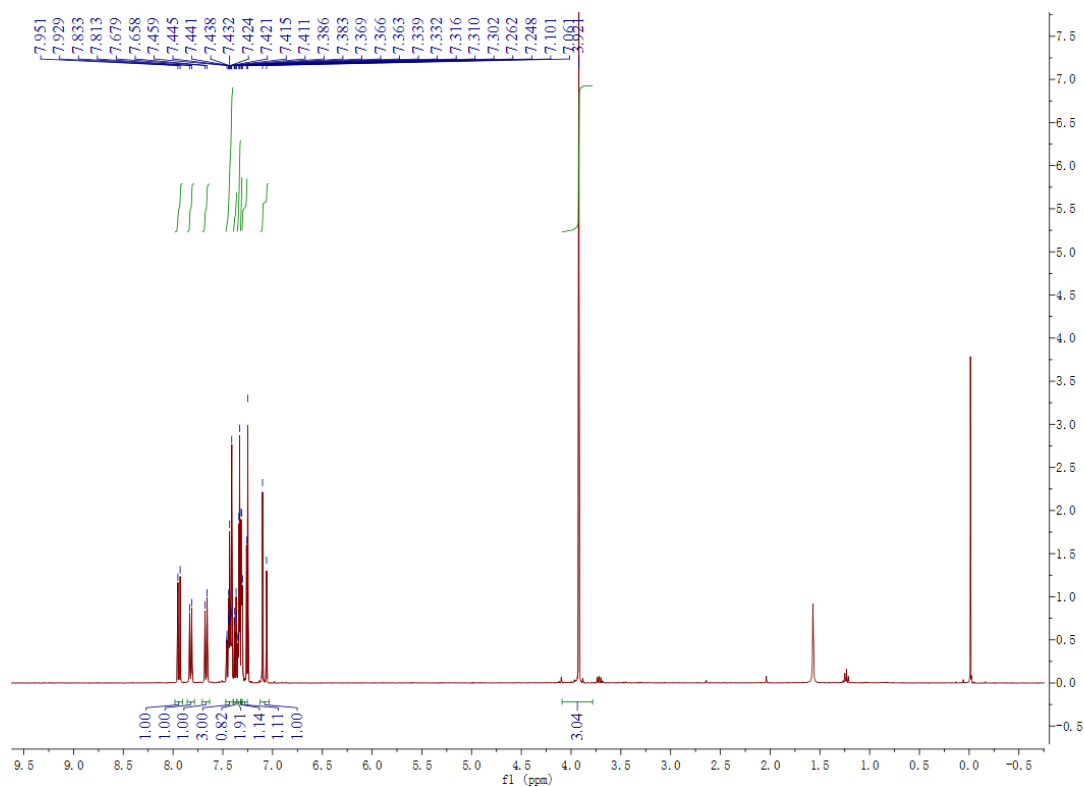

**Figure S31 : <sup>1</sup>H NMR of Compound 3k**

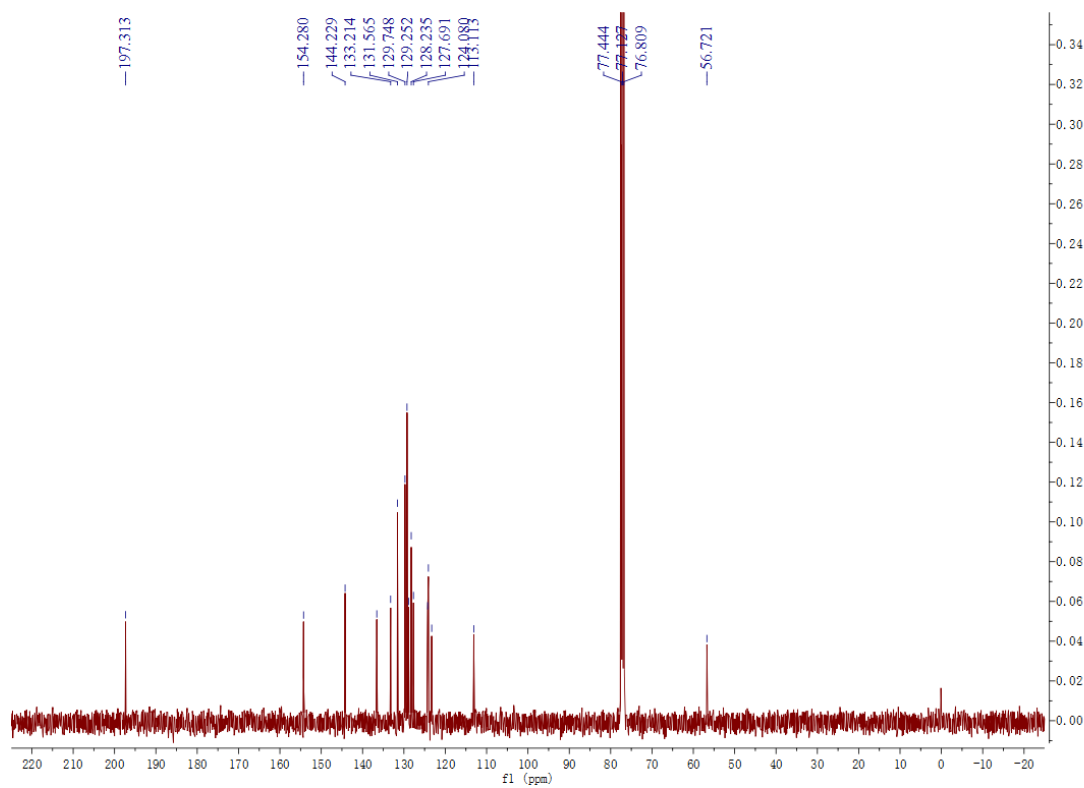

**Figure S32 : <sup>13</sup>C NMR of Compound 3k**

## Mass Spectrum SmartFormula Report

### Analysis Info

Analysis Name D:\2019.10.11\liuwenjing\w4-11-1.d  
Method 20180330pos.m  
Sample Name w4-11-1  
Comment

Acquisition Date 10/9/2019 3:35:48 PM

Operator BDAL@DE  
Instrument micrOTOF-Q II 228888.10354

### Acquisition Parameter

|             |          |                       |           |                  |           |
|-------------|----------|-----------------------|-----------|------------------|-----------|
| Source Type | ESI      | Ion Polarity          | Positive  | Set Nebulizer    | 1.2 Bar   |
| Focus       | Active   | Set Capillary         | 4500 V    | Set Dry Heater   | 180 °C    |
| Scan Begin  | 50 m/z   | Set End Plate Offset  | -500 V    | Set Dry Gas      | 6.0 l/min |
| Scan End    | 1500 m/z | Set Collision Cell RF | 400.0 Vpp | Set Divert Valve | Waste     |

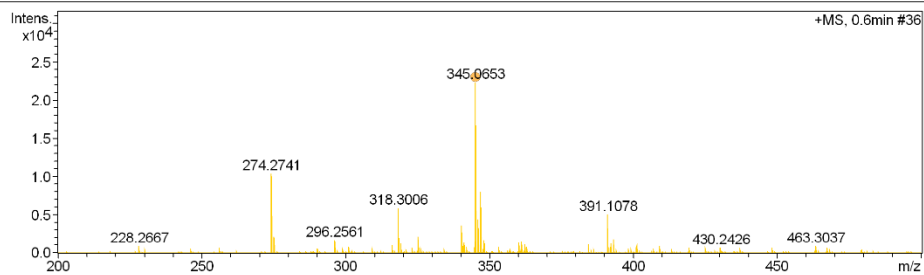

| Meas. m/z | # | Ion Formula                                        | m/z      | err [ppm] | mSigma | # mSigma | Score  | rdb  | e <sup>-</sup> | Conf | N-Rule |
|-----------|---|----------------------------------------------------|----------|-----------|--------|----------|--------|------|----------------|------|--------|
| 345.0653  | 1 | C <sub>20</sub> H <sub>15</sub> ClNaO <sub>2</sub> | 345.0653 | 0.0       | 11.3   | 1        | 100.00 | 12.5 | even           |      | ok     |

**Figure S33: HRMS of Compound 3k**

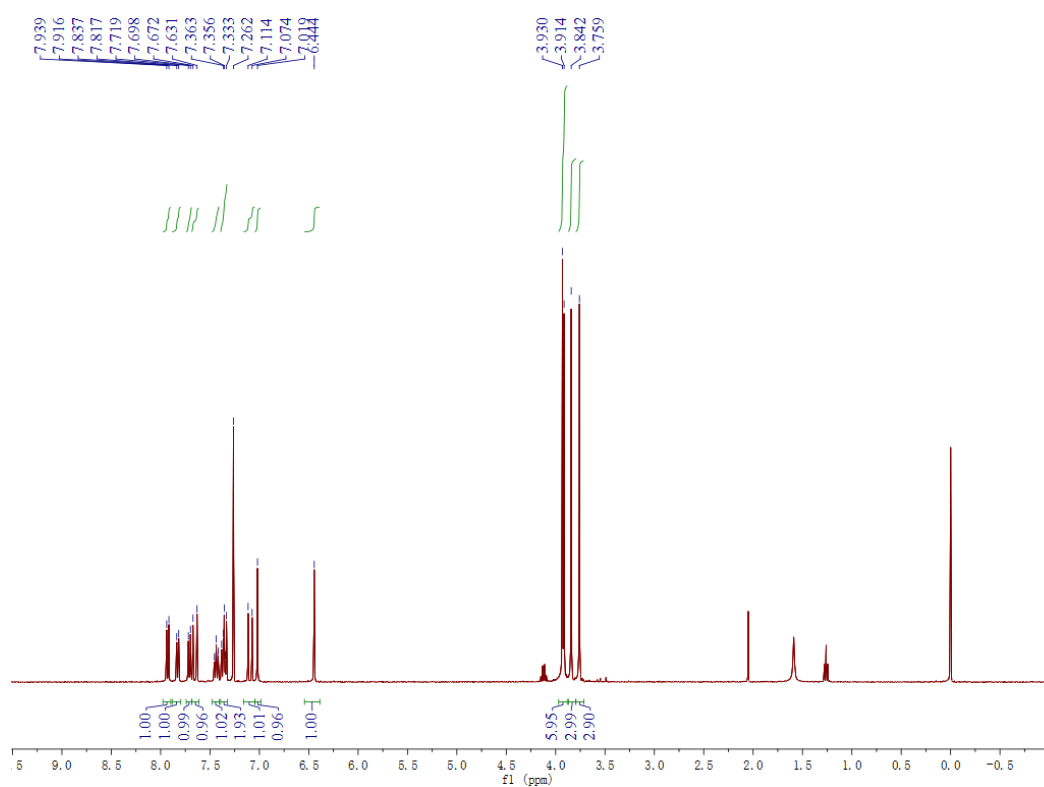

**Figure S34 : <sup>1</sup>H NMR of Compound 3l**

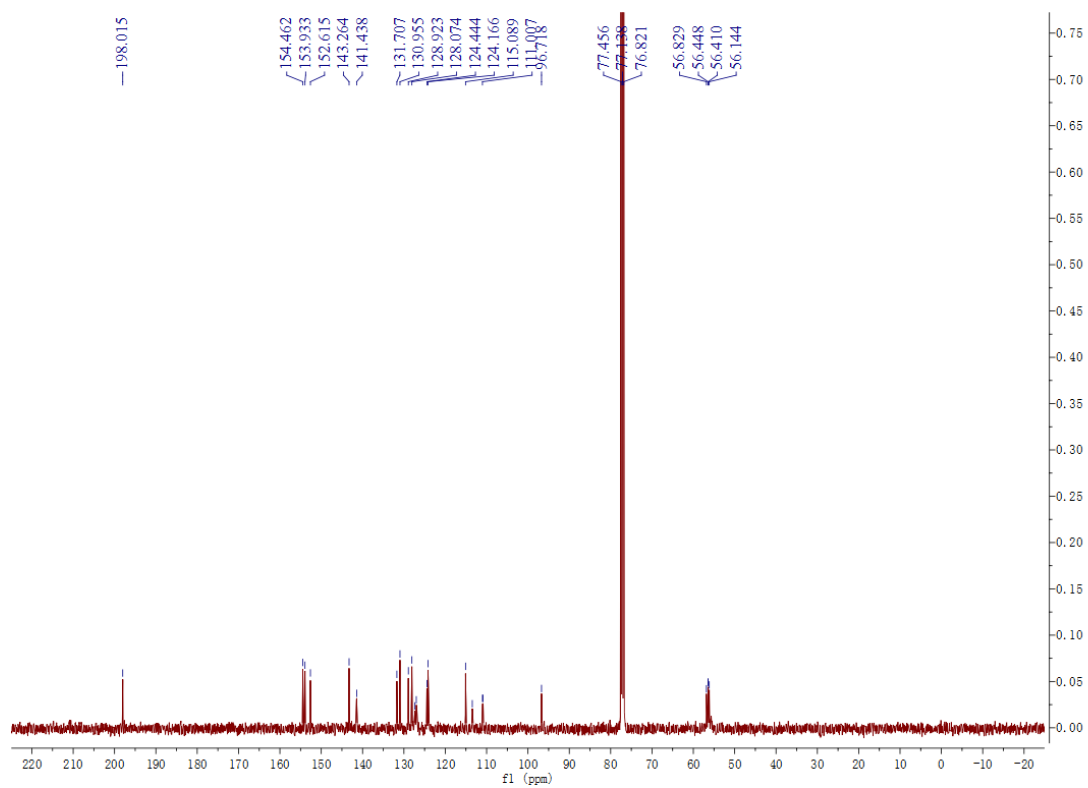

**Figure S35 : <sup>13</sup>C NMR of Compound 3l**

## Mass Spectrum SmartFormula Report

### Analysis Info

Analysis Name D:\2019.10.11\liuwenjing\w4--12-2.d  
Method 20180330pos.m  
Sample Name w4-12-2  
Comment

Acquisition Date 10/9/2019 4:55:36 PM

Operator BDAL@DE  
Instrument micrOTOF-Q II 228888.10354

### Acquisition Parameter

|             |          |                       |           |                  |           |
|-------------|----------|-----------------------|-----------|------------------|-----------|
| Source Type | ESI      | Ion Polarity          | Positive  | Set Nebulizer    | 1.2 Bar   |
| Focus       | Active   | Set Capillary         | 4500 V    | Set Dry Heater   | 180 °C    |
| Scan Begin  | 50 m/z   | Set End Plate Offset  | -500 V    | Set Dry Gas      | 6.0 l/min |
| Scan End    | 1500 m/z | Set Collision Cell RF | 400.0 Vpp | Set Divert Valve | Waste     |

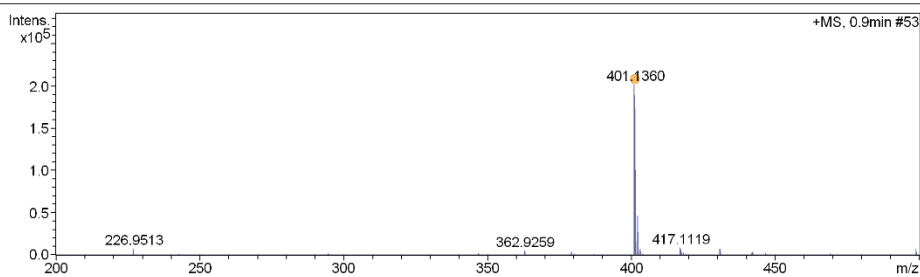

| Meas. m/z | # | Ion Formula                                      | m/z      | err [ppm] | mSigma | # mSigma | Score  | rdB  | e <sup>-</sup> | Conf | N-Rule |
|-----------|---|--------------------------------------------------|----------|-----------|--------|----------|--------|------|----------------|------|--------|
| 401.1360  | 1 | C <sub>23</sub> H <sub>22</sub> NaO <sub>5</sub> | 401.1359 | -0.2      | 12.0   | 1        | 100.00 | 12.5 | even           |      | ok     |

**Figure S36: HRMS of Compound 3l**

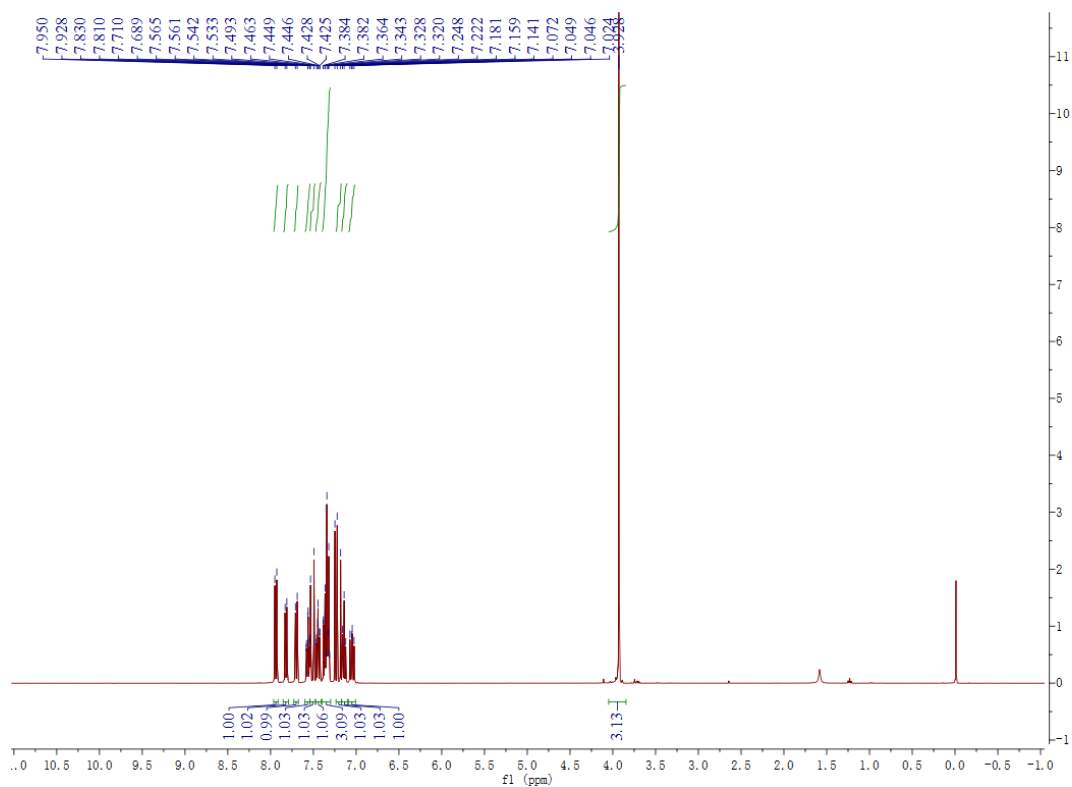

**Figure S37 : <sup>1</sup>H NMR of Compound 3m**

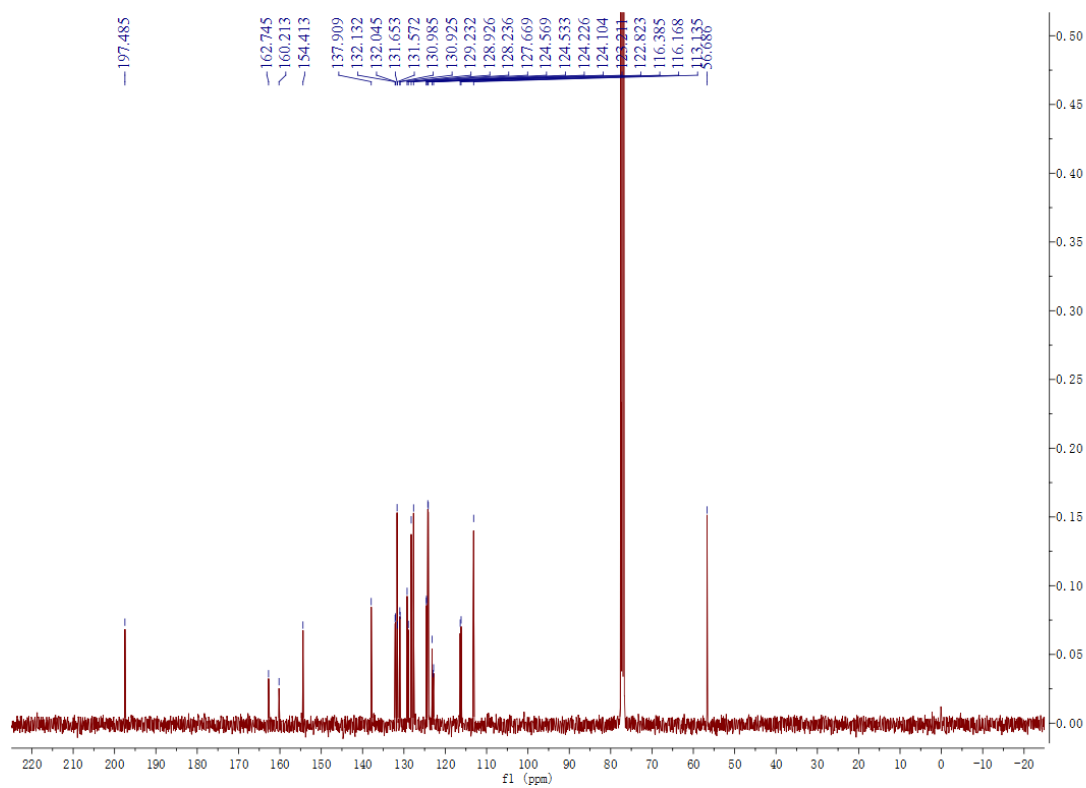

**Figure S38 : <sup>13</sup>C NMR of Compound 3m**

## Mass Spectrum SmartFormula Report

### Analysis Info

Analysis Name D:\2019.10.11\Niuwenjing\w4--13-3.d  
Method 20180330pos.m  
Sample Name w4-13-3  
Comment

Acquisition Date 10/9/2019 5:13:43 PM

Operator BDAL@DE  
Instrument micrOTOF-Q II 228888.10354

### Acquisition Parameter

|             |          |                       |           |                  |           |
|-------------|----------|-----------------------|-----------|------------------|-----------|
| Source Type | ESI      | Ion Polarity          | Positive  | Set Nebulizer    | 1.2 Bar   |
| Focus       | Active   | Set Capillary         | 4500 V    | Set Dry Heater   | 180 °C    |
| Scan Begin  | 50 m/z   | Set End Plate Offset  | -500 V    | Set Dry Gas      | 6.0 l/min |
| Scan End    | 1500 m/z | Set Collision Cell RF | 400.0 Vpp | Set Divert Valve | Waste     |

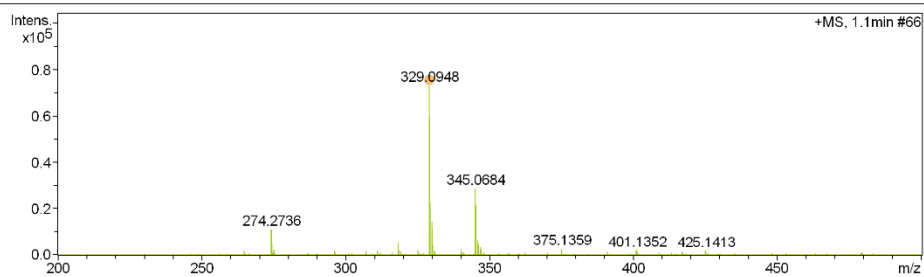

| Meas. m/z | # | Ion Formula                                       | m/z      | err [ppm] | mSigma | # mSigma | Score  | rdb  | e <sup>-</sup> Conf | N-Rule |
|-----------|---|---------------------------------------------------|----------|-----------|--------|----------|--------|------|---------------------|--------|
| 329.0948  | 1 | C <sub>20</sub> H <sub>15</sub> FNaO <sub>2</sub> | 329.0948 | 0.2       | 12.0   | 1        | 100.00 | 12.5 | even                | ok     |

**Figure S39: HRMS of Compound 3m**

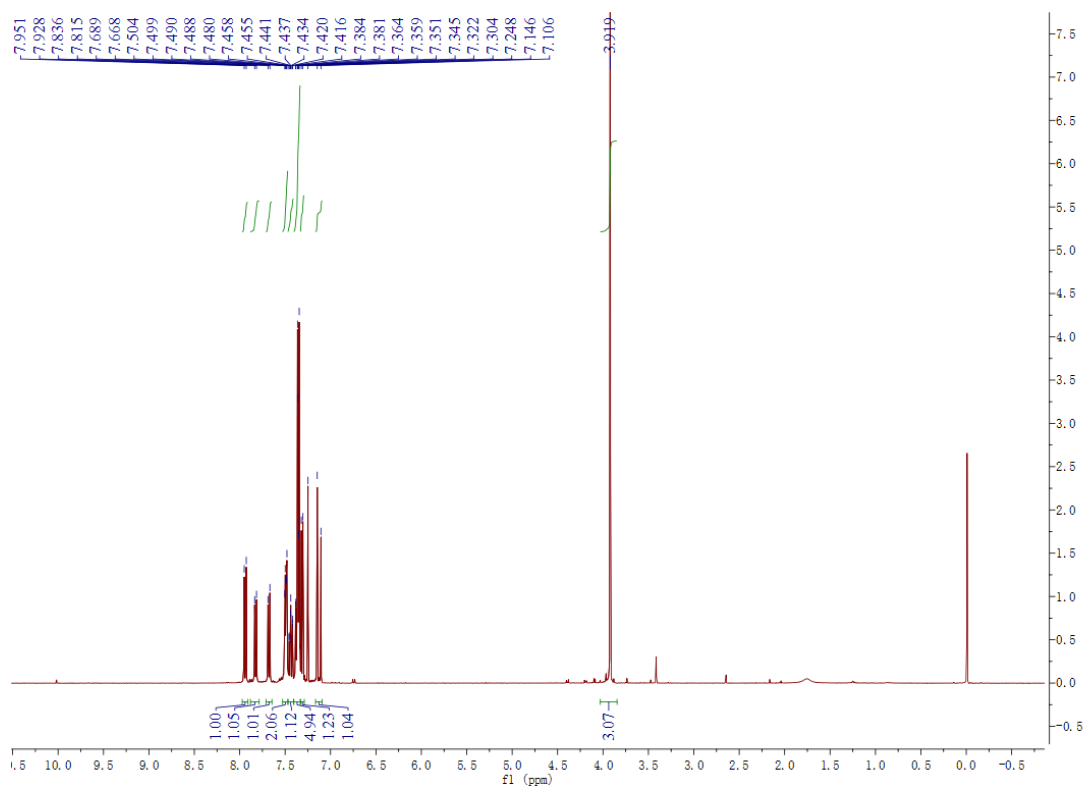

**Figure S40 :  $^1\text{H}$  NMR of Compound 3n**

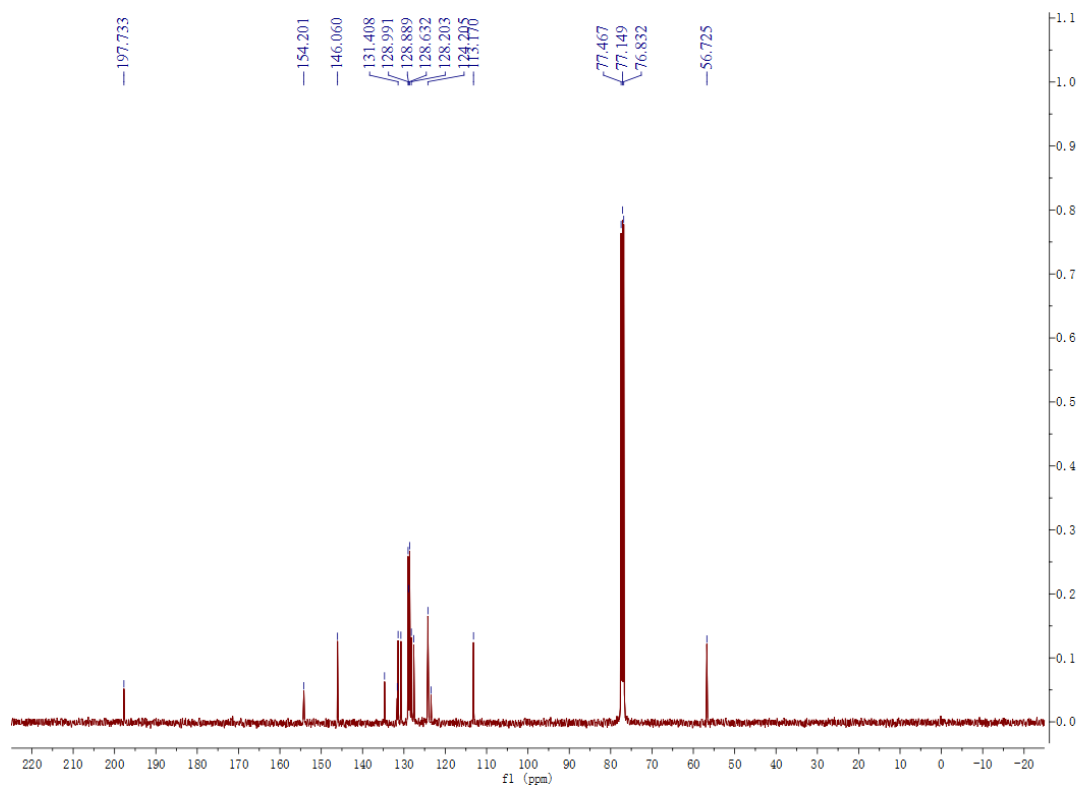

**Figure S41 :  $^{13}\text{C}$  NMR of Compound 3n**

## Mass Spectrum SmartFormula Report

### Analysis Info

Analysis Name D:\2019.10.11\Niuwenjing\w4--14-1.d  
Method 20180330pos.m  
Sample Name w4-14-1  
Comment

Acquisition Date 10/9/2019 5:20:05 PM

Operator BDAL@DE  
Instrument micrOTOF-Q II 228888.10354

### Acquisition Parameter

|             |          |                       |           |                  |           |
|-------------|----------|-----------------------|-----------|------------------|-----------|
| Source Type | ESI      | Ion Polarity          | Positive  | Set Nebulizer    | 1.2 Bar   |
| Focus       | Active   | Set Capillary         | 4500 V    | Set Dry Heater   | 180 °C    |
| Scan Begin  | 50 m/z   | Set End Plate Offset  | -500 V    | Set Dry Gas      | 6.0 l/min |
| Scan End    | 1500 m/z | Set Collision Cell RF | 400.0 Vpp | Set Divert Valve | Waste     |

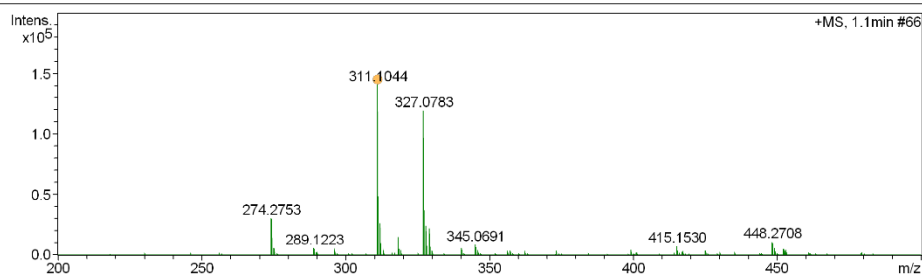

| Meas. m/z | # | Ion Formula                                      | m/z      | err [ppm] | mSigma | # mSigma | Score  | rdb  | e <sup>-</sup> | Conf | N-Rule |
|-----------|---|--------------------------------------------------|----------|-----------|--------|----------|--------|------|----------------|------|--------|
| 311.1044  | 1 | C <sub>20</sub> H <sub>16</sub> NaO <sub>2</sub> | 311.1043 | -0.5      | 16.3   | 1        | 100.00 | 12.5 | even           |      | ok     |

**Figure S42: HRMS of Compound 3n**

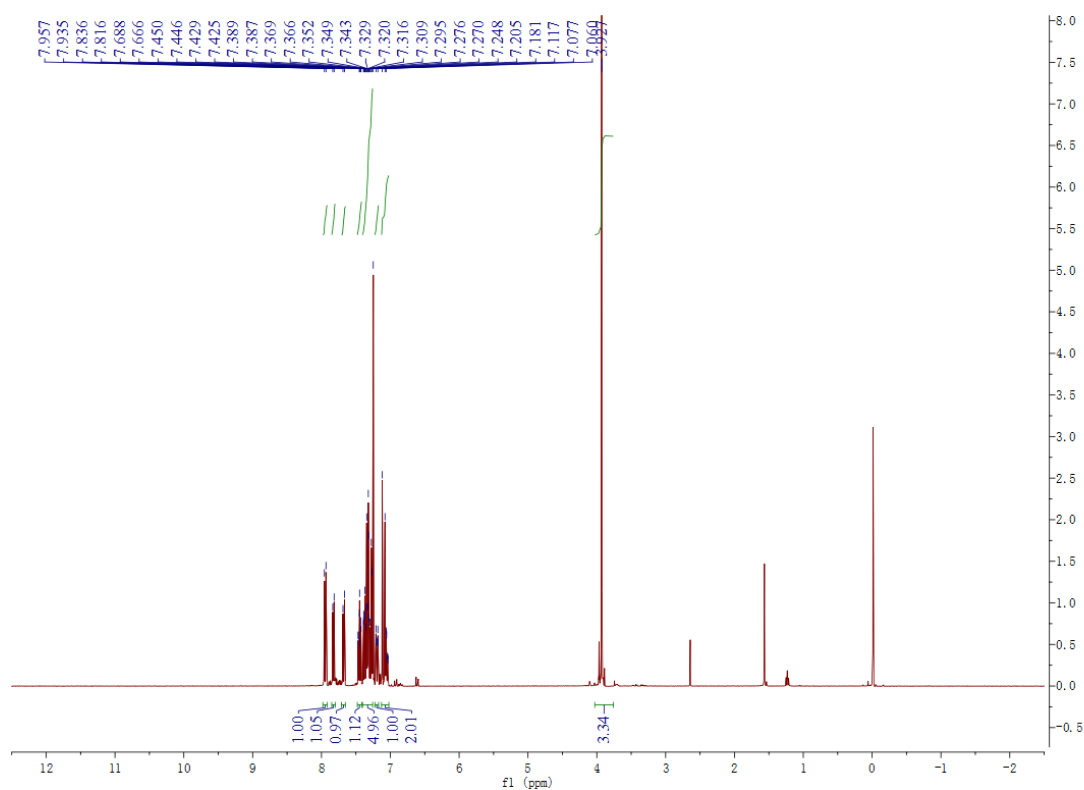

**Figure S43 :  $^1\text{H}$  NMR of Compound 3o**

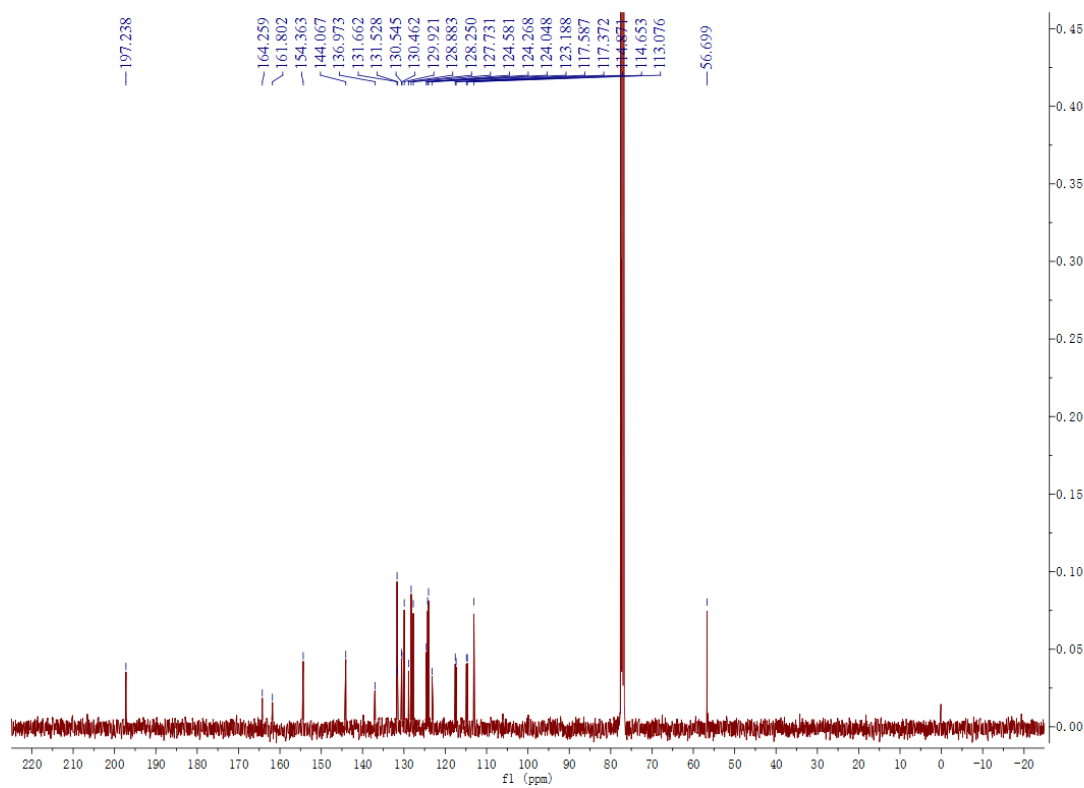

**Figure S44:  $^{13}\text{C}$  NMR of Compound 3o**

## Mass Spectrum SmartFormula Report

### Analysis Info

Analysis Name D:\2019.10.11\liuwenjing\w4--15-9.d  
Method 20180630pos.m  
Sample Name w4--15-9  
Comment

Acquisition Date 10/10/2019 4:29:20 PM

Operator BDAL@DE  
Instrument micrOTOF-Q II 228888.10354

### Acquisition Parameter

|             |          |                       |           |                  |           |
|-------------|----------|-----------------------|-----------|------------------|-----------|
| Source Type | ESI      | Ion Polarity          | Positive  | Set Nebulizer    | 1.4 Bar   |
| Focus       | Active   | Set Capillary         | 4500 V    | Set Dry Heater   | 180 °C    |
| Scan Begin  | 50 m/z   | Set End Plate Offset  | -500 V    | Set Dry Gas      | 8.0 l/min |
| Scan End    | 1500 m/z | Set Collision Cell RF | 400.0 Vpp | Set Divert Valve | Source    |

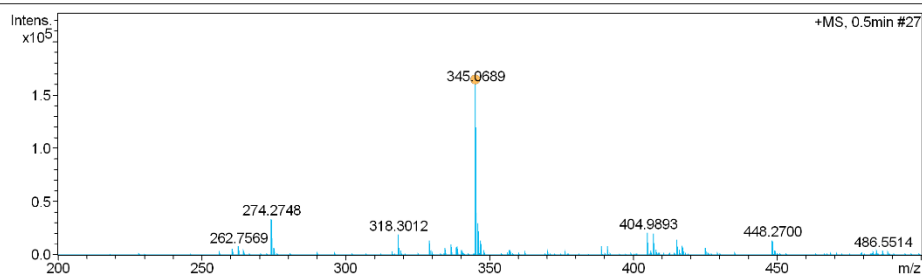

**Figure S45: HRMS of Compound 3o**

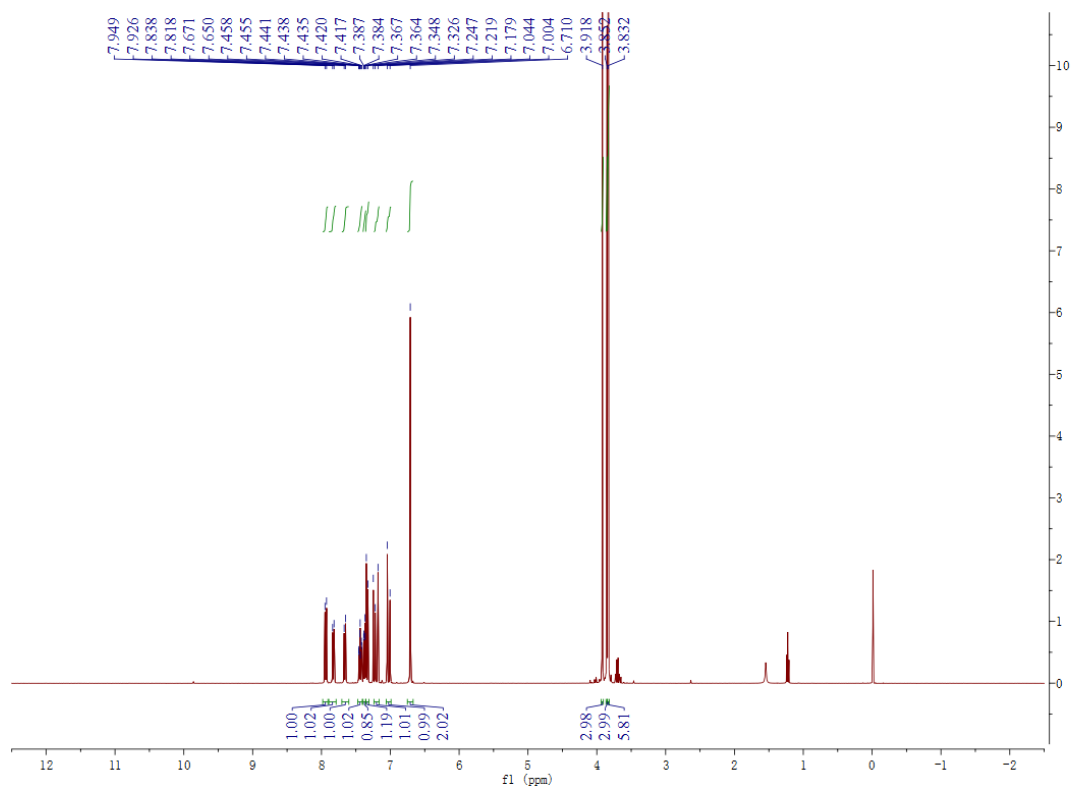

**Figure S46 : <sup>1</sup>H NMR of Compound 3p**

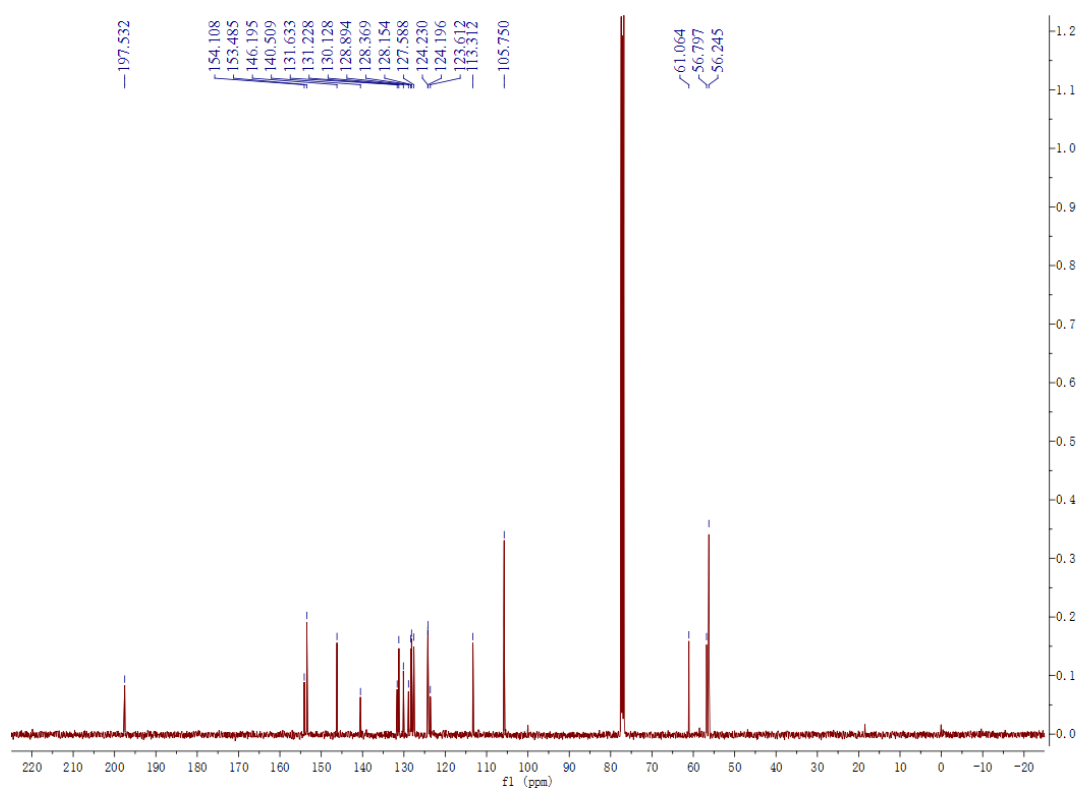

**Figure S47: <sup>13</sup>C NMR of Compound 3p**

## Mass Spectrum SmartFormula Report

### Analysis Info

Analysis Name D:\2019.10.11\liuwenjing\w4--16-9.d  
Method 20180330pos.m  
Sample Name w4--16-8  
Comment

Acquisition Date 10/10/2019 4:00:59 PM

Operator BDAL@DE  
Instrument micrOTOF-Q II 228888.10354

### Acquisition Parameter

|             |          |                       |           |                  |           |
|-------------|----------|-----------------------|-----------|------------------|-----------|
| Source Type | ESI      | Ion Polarity          | Positive  | Set Nebulizer    | 1.2 Bar   |
| Focus       | Active   | Set Capillary         | 4500 V    | Set Dry Heater   | 180 °C    |
| Scan Begin  | 50 m/z   | Set End Plate Offset  | -500 V    | Set Dry Gas      | 6.0 l/min |
| Scan End    | 1500 m/z | Set Collision Cell RF | 400.0 Vpp | Set Divert Valve | Waste     |

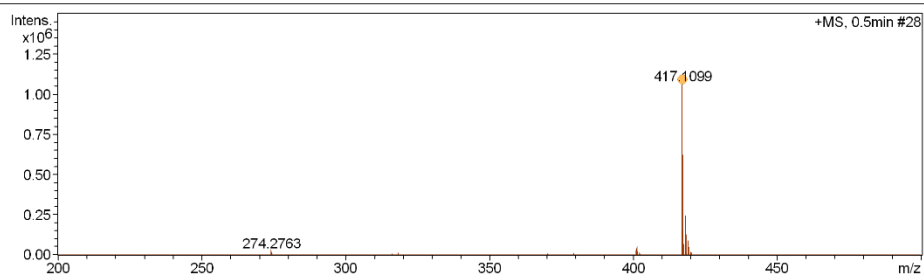

| Meas. m/z | # | Ion Formula                                     | m/z      | err [ppm] | mSigma | # mSigma | Score  | rdb  | e <sup>-</sup> | Conf | N-Rule |
|-----------|---|-------------------------------------------------|----------|-----------|--------|----------|--------|------|----------------|------|--------|
| 417.1099  | 1 | C <sub>23</sub> H <sub>22</sub> KO <sub>5</sub> | 417.1099 | -0.1      | 17.1   | 1        | 100.00 | 12.5 | even           |      | ok     |

**Figure S48: HRMS of Compound 3p**

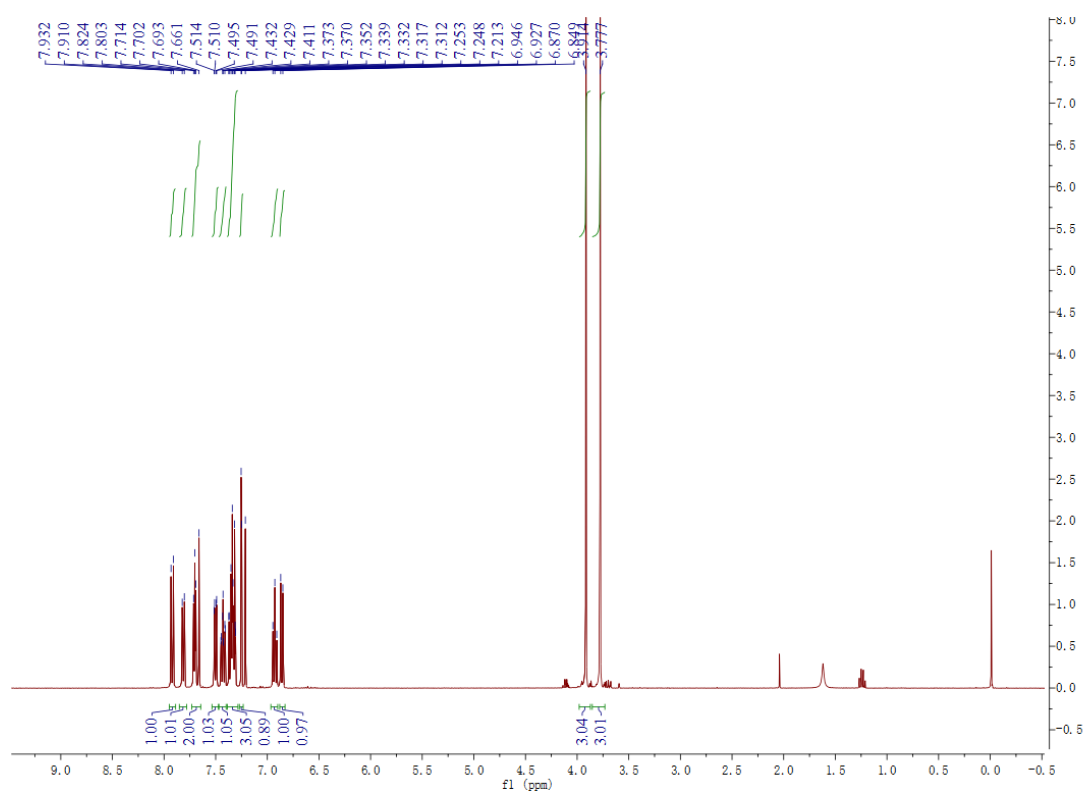

**Figure S49:  $^1\text{H}$  NMR of Compound 3q**

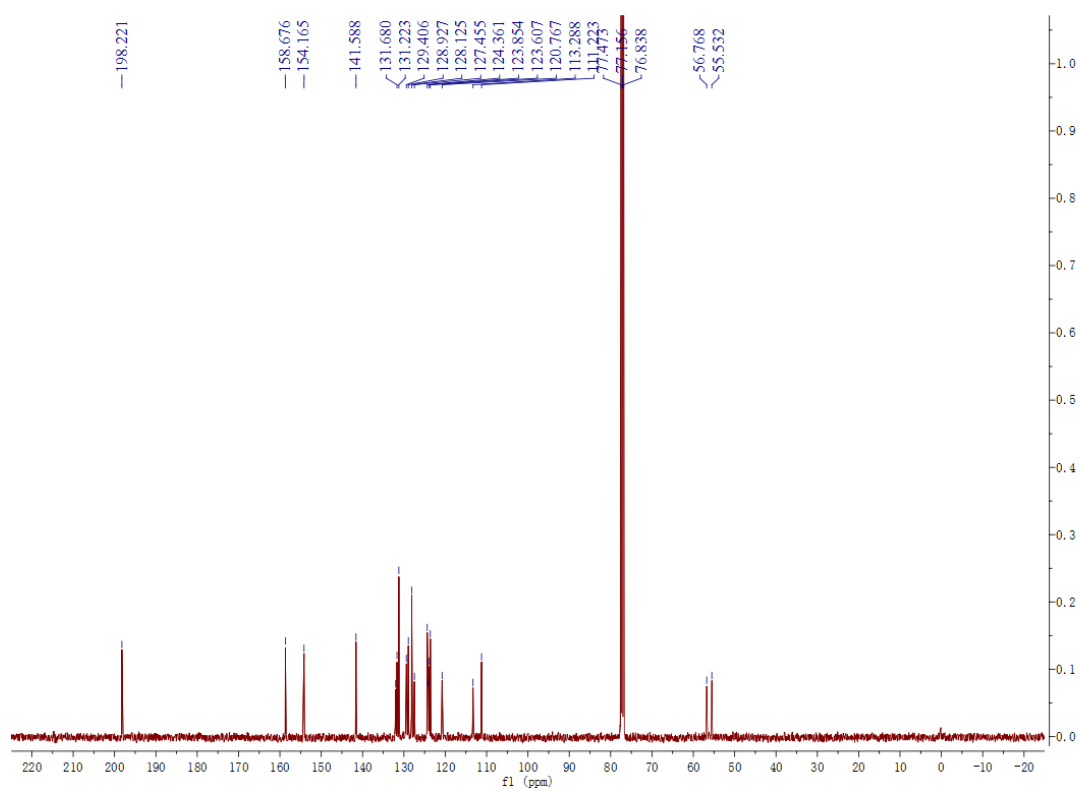

**Figure S50 :  $^{13}\text{C}$  NMR of Compound 3q**

## Mass Spectrum SmartFormula Report

### Analysis Info

Analysis Name D:\2019.10.11\liuwenjing\17-18  
Method 20180330pos.m  
Sample Name w4-17-19  
Comment

Acquisition Date 10/15/2019 9:50:45 AM

Operator BDAL@DE  
Instrument micrOTOF-Q II 228888.10354

### Acquisition Parameter

|             |          |                       |           |                  |           |
|-------------|----------|-----------------------|-----------|------------------|-----------|
| Source Type | ESI      | Ion Polarity          | Positive  | Set Nebulizer    | 1.2 Bar   |
| Focus       | Active   | Set Capillary         | 4500 V    | Set Dry Heater   | 180 °C    |
| Scan Begin  | 50 m/z   | Set End Plate Offset  | -500 V    | Set Dry Gas      | 6.0 l/min |
| Scan End    | 1500 m/z | Set Collision Cell RF | 400.0 Vpp | Set Divert Valve | Waste     |

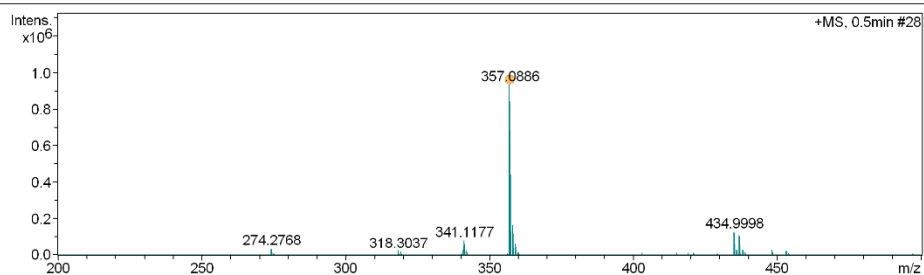

| Meas. m/z | # | Ion Formula                                     | m/z      | err [ppm] | mSigma | # mSigma | Score  | rdb  | e <sup>-</sup> Conf | N-Rule |
|-----------|---|-------------------------------------------------|----------|-----------|--------|----------|--------|------|---------------------|--------|
| 357.0886  | 1 | C <sub>21</sub> H <sub>18</sub> KO <sub>3</sub> | 357.0888 | 0.3       | 31.9   | 1        | 100.00 | 12.5 | even                | ok     |

**Figure S51: HRMS of Compound 3q**

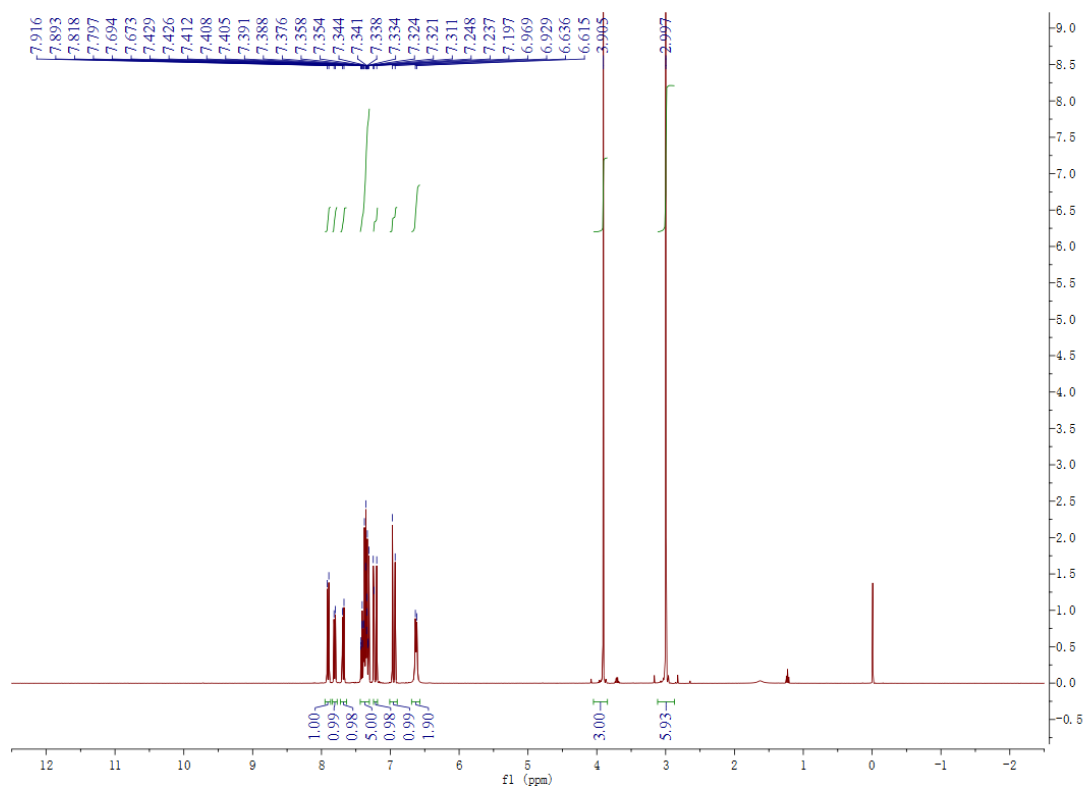

**Figure S52 :  $^1\text{H}$  NMR of Compound 3r**

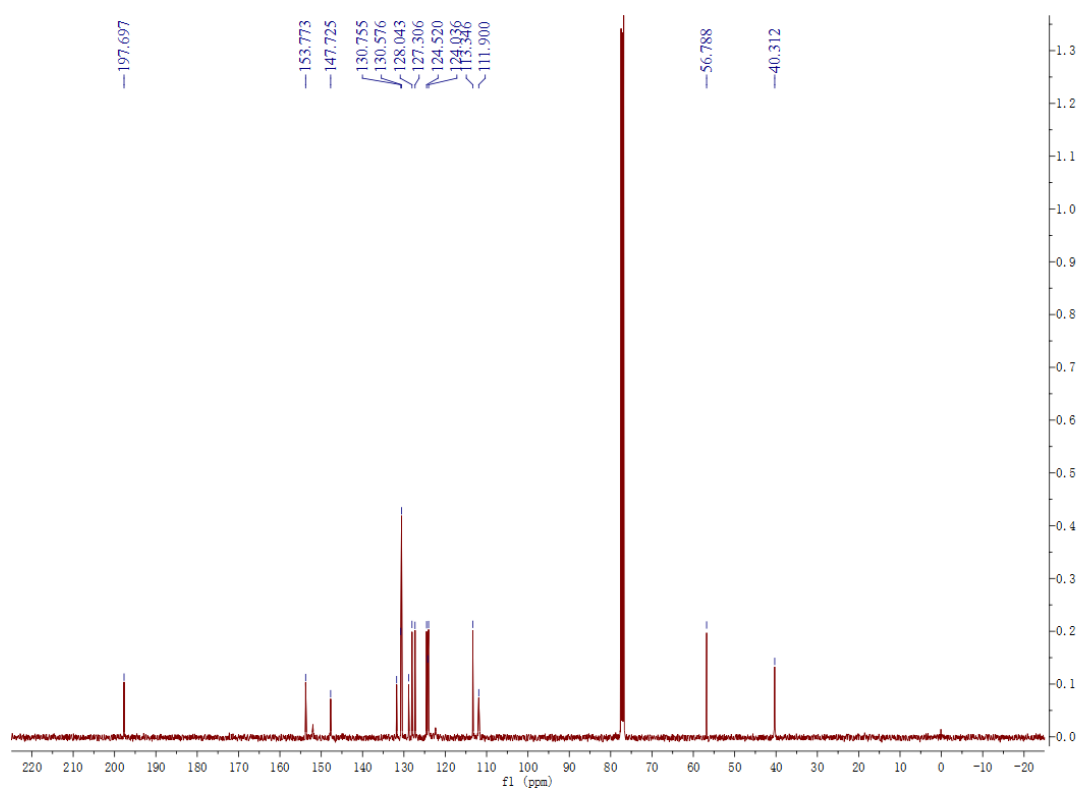

**Figure S53:  $^{13}\text{C}$  NMR of Compound 3r**

## Mass Spectrum SmartFormula Report

### Analysis Info

Analysis Name D:\2019.10.11\liuwenjing\w4-18-20.d  
Method 20180330pos.m  
Sample Name w4-18-20  
Comment

Acquisition Date 10/15/2019 10:16:20 AM

Operator BDAL@DE  
Instrument micrOTOF-Q II 228888.10354

### Acquisition Parameter

|             |          |                       |           |                  |           |
|-------------|----------|-----------------------|-----------|------------------|-----------|
| Source Type | ESI      | Ion Polarity          | Positive  | Set Nebulizer    | 1.2 Bar   |
| Focus       | Active   | Set Capillary         | 4500 V    | Set Dry Heater   | 180 °C    |
| Scan Begin  | 50 m/z   | Set End Plate Offset  | -500 V    | Set Dry Gas      | 6.0 l/min |
| Scan End    | 1500 m/z | Set Collision Cell RF | 400.0 Vpp | Set Divert Valve | Waste     |

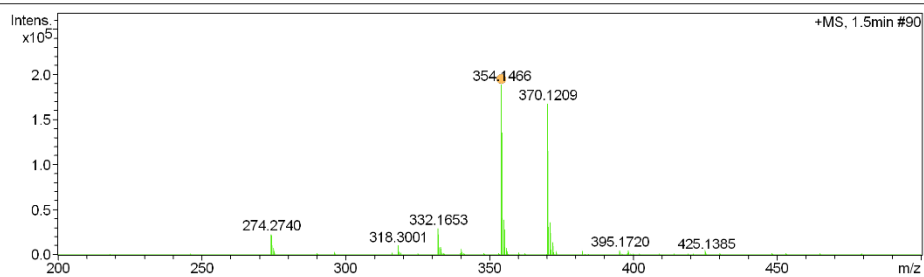

| Meas. m/z | # | Ion Formula                                       | m/z      | err [ppm] | mSigma | # mSigma | Score  | rdB  | e <sup>-</sup> Conf | N-Rule |
|-----------|---|---------------------------------------------------|----------|-----------|--------|----------|--------|------|---------------------|--------|
| 354.1466  | 1 | C <sub>22</sub> H <sub>21</sub> NNaO <sub>2</sub> | 354.1464 | -0.6      | 20.1   | 1        | 100.00 | 12.5 | even                | ok     |

**Figure S54: HRMS of Compound 3r**

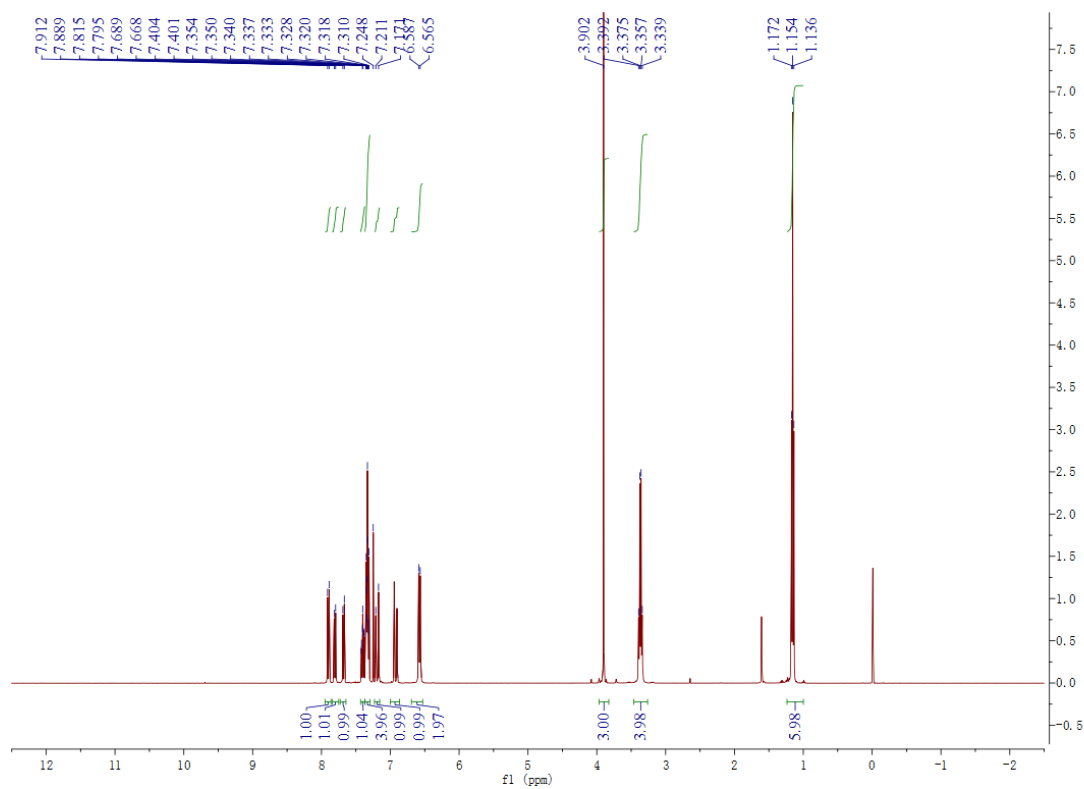

**Figure S55 : <sup>1</sup>H NMR of Compound 3s**

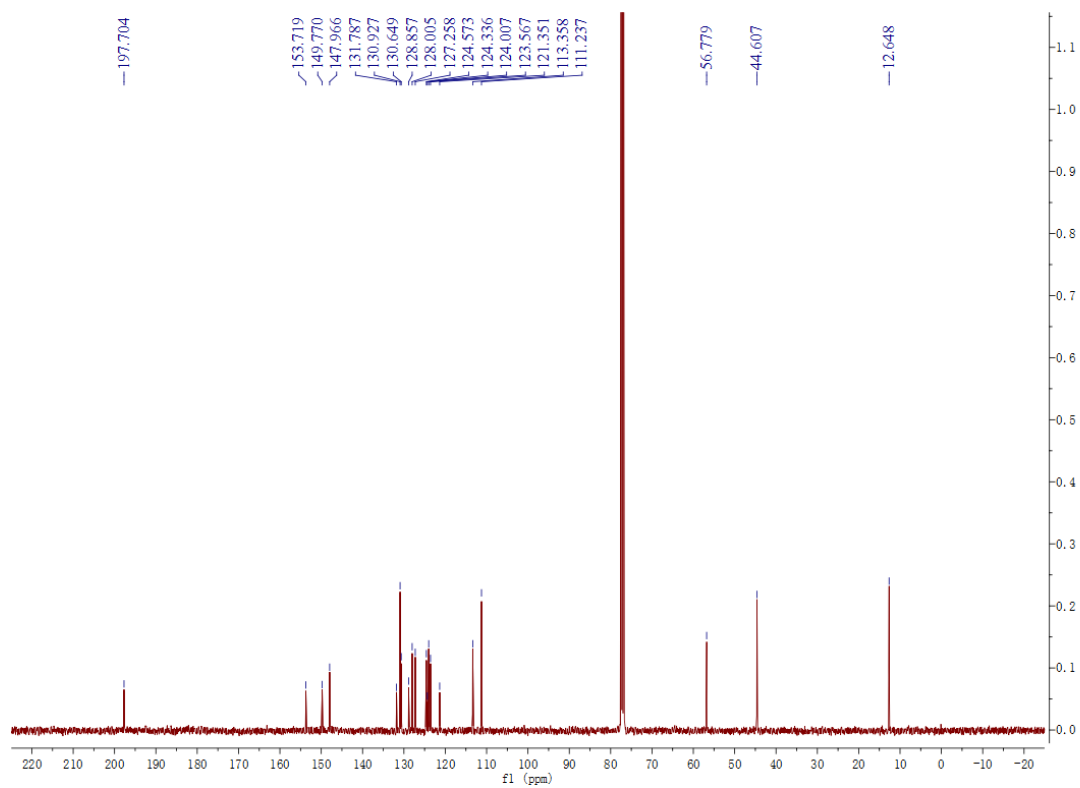

**Figure S56 : <sup>13</sup>C NMR of Compound 3s**

## Mass Spectrum SmartFormula Report

### Analysis Info

Analysis Name D:\2019.10.11\Niuwenjing\123456  
Method 20180330pos.m  
Sample Name w4-19-22  
Comment

Acquisition Date 10/15/2019 10:19:00 AM

Operator BDAL@DE  
Instrument micrOTOF-Q II 228888.10354

### Acquisition Parameter

|             |          |                       |           |                  |           |
|-------------|----------|-----------------------|-----------|------------------|-----------|
| Source Type | ESI      | Ion Polarity          | Positive  | Set Nebulizer    | 1.2 Bar   |
| Focus       | Active   | Set Capillary         | 4500 V    | Set Dry Heater   | 180 °C    |
| Scan Begin  | 50 m/z   | Set End Plate Offset  | -500 V    | Set Dry Gas      | 6.0 l/min |
| Scan End    | 1500 m/z | Set Collision Cell RF | 400.0 Vpp | Set Divert Valve | Waste     |

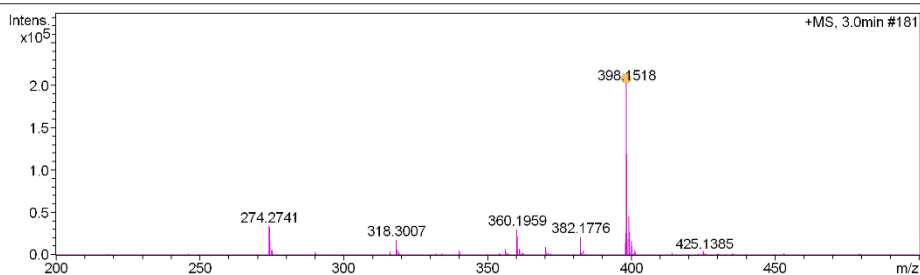

**Figure S57: HRMS of Compound 3s**

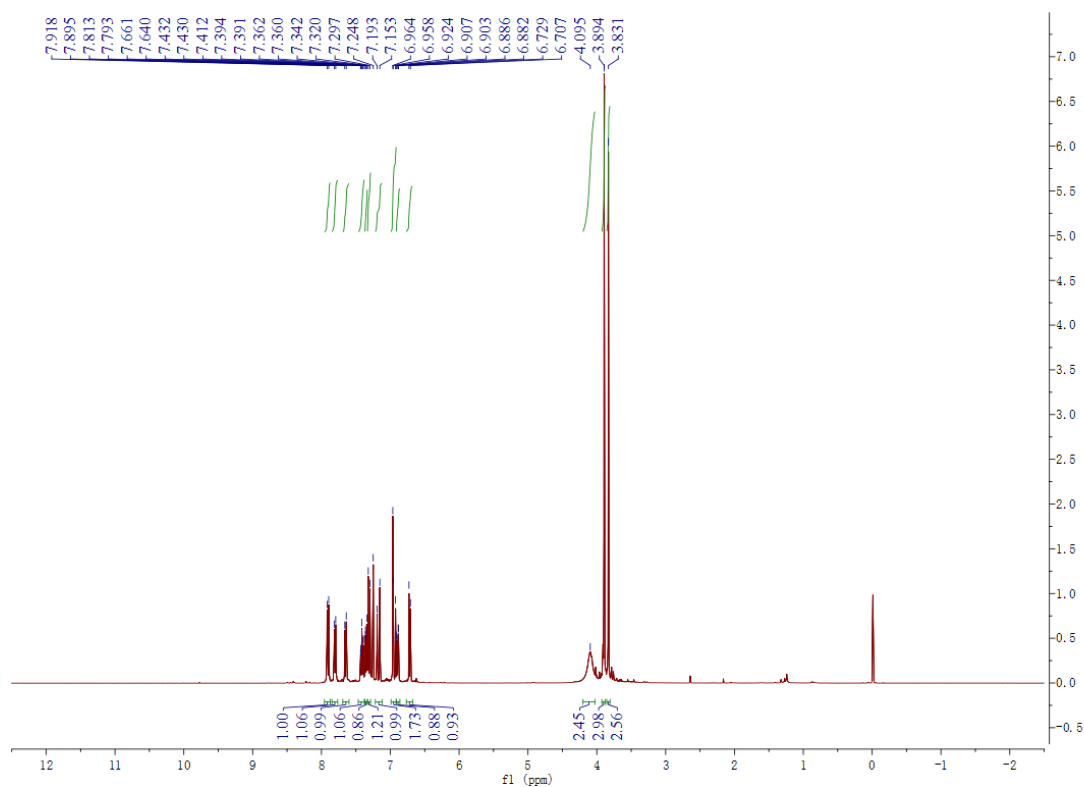

**Figure S58:  $^1\text{H}$  NMR of Compound 3t**

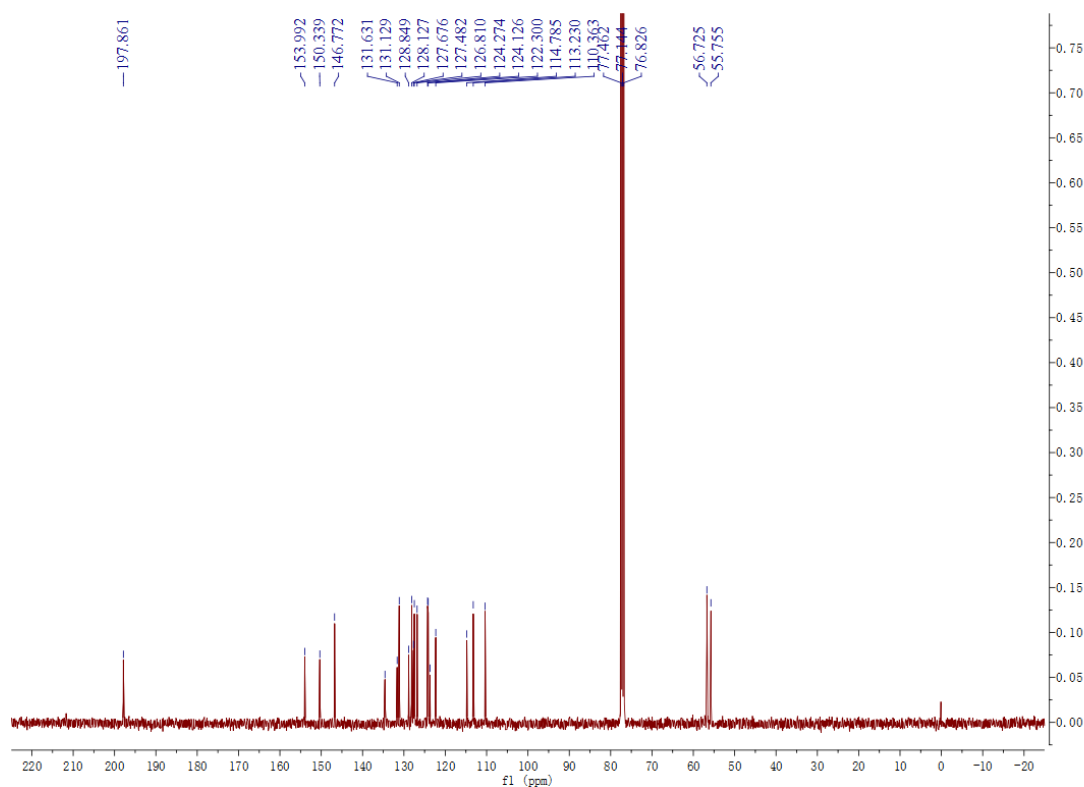

**Figure S59 :  $^{13}\text{C}$  NMR of Compound 3t**

## Mass Spectrum SmartFormula Report

### Analysis Info

Analysis Name D:\2019.10.11\liuwenjing\w4--20.d  
Method 20180330pos.m  
Sample Name w4-20  
Comment

Acquisition Date 10/9/2019 7:43:39 PM

Operator BDAL@DE  
Instrument micrOTOF-Q II 228888.10354

### Acquisition Parameter

|             |          |                       |           |                  |           |
|-------------|----------|-----------------------|-----------|------------------|-----------|
| Source Type | ESI      | Ion Polarity          | Positive  | Set Nebulizer    | 1.2 Bar   |
| Focus       | Active   | Set Capillary         | 4500 V    | Set Dry Heater   | 180 °C    |
| Scan Begin  | 50 m/z   | Set End Plate Offset  | -500 V    | Set Dry Gas      | 6.0 l/min |
| Scan End    | 1500 m/z | Set Collision Cell RF | 400.0 Vpp | Set Divert Valve | Waste     |

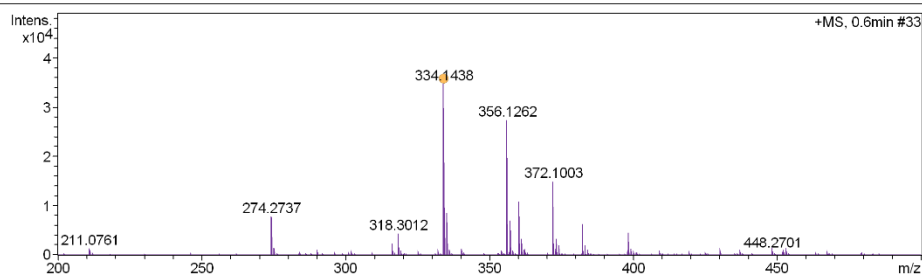

**Figure S60 : HRMS of Compound 3t**
